# Supplementary material for: Genome-Wide Identification and Evolution Analysis of the Gibberellin Oxidase Gene Family in Six Gramineae Crops
Source: MDPI journal article supplement (doi:10.3390/genes13050863), 2022-05-12
Supplement: s1 [file s1]

>KQJ85786

LPTLDLEEGLTEALAAACRDLGVFRLAN--HGIPAD--LSDRLFSLTRHLL-EEPDAEKK  
AKFSGTP-ALSKEINWVEEV-TEAEYVSRMARIARKLFDAMD-GLAEHDGTFRAYRYPAC  
-P-IGMEAHTDSSVLSILNQDESSLQVTWRSVQPEGT--LVVNIGDMMQAITGDAYRSV  
EHRV-VP-TDRMSLCYFAFPQDDAVISGCGYRPFSEYEFREQ

>HORVU3Hr1G117870.1

LRAVDLEAILTEELAAACRDPGVFRLVN--HGVPSN--LTARLLALARGLL-ELDAATKS  
R-FCGTP-ALAKEPNWLEEAVSGEYVAHMARIARKVFDTLASGELTERGCIFRAYRYPAA  
-A-VGMEAHTDSSVLSILN-QDVGGLQVCWRAVRPEGA--LVNVNVDMLQAMSGDAYRSP  
EHRV-VA-ADRMSLCYFAFPPEEEAVIVGGRYQGFSYEFREQ

>LOC\_Os04g33360.1

LPTDLEREDRAALVAACRDLGAFRVVN--HGVPGE--LRRRLLELGKQLLGRDTFELKK  
A-FWGTAALKSKEVNWLEALM-AEYGDHMAIRARKLFDALAA-ELAERQGFRLRYRPPC  
-P-LGMEPHTDSSVLSIILGQDVGGGLQVAVWRDVAPPGE--LLVNLGDMMTAISGGSYQSV  
RHRV-LASTERVSCCYFAFPQEDAVVEAPSYRPFSEYEFREQ

>KQL09066

LPTVDLEAPA---LDAACRGLGIFRLAN--HGVPAD--LTARLFALARDLLGRTPFPEKK  
A-FWGTPPEPSRDVNWIEDLV-AEYADHMAIRVARRLFDAIAE-ALNEHGGYLRVHRYPRC  
-P-HGIQAHTDSTTLIIN-QDSGGLQVAVWRDLAADGA--LLVNLGDMAKAISADAYRSV  
PHRV-VADDERLSLCYFAFPRDDAVVS---YRPFTVEFRAQ

>KQL09067

VPTVDLQA-----LAAACRRLGVFRLAN--HGVPGD--LSARLFALARDLLGRAPFLDKQ  
A-FWGTP-ALSRDWNWVEDLA-REYGAHMAIRVARALFDALAA-ALAERDGFRLVRYRPPC  
-P-LGMEAHTDSSVLSVIN-QDVGGLQVAVWRDVAPAGT--LLVNLGDMARAISGDWRSV  
RHRV-AA-AERLSLCYFAFPRDDAVITC--YRPFTYEFREQ

>Zm00001d035994\_P001

LPTVDLEA-----LAAACRELGVFRLAN--HGVPA--LSARLFALARAALAGAPFRDKR  
A-FWGTP-ALSRDWNWVEGLARAHEYGAHMTRVARTLFDALAP-ALAERDGFRLVRYRPPC  
-P-LGMEAHTDSSVLSVIN-QEAGGLQVAVWRDVAPAGASTLLVNLGDMARAISGDAYRSV  
RHRV-AA-AERLSLCYFAFPRDDAVIT---YRPFTYEFREQ

>OQU85872

LPTVDLDA-----LAAACRGLGVFRLAN--HGVPAS--LSARLFATARAALAGAPFHDKR  
A-FWGTP-ALSRDWNWVEDLA-AEYGAHMAIRVARALFDALAA-PLAERDGFRLVRYRPPC  
-P-LGMEAHTDSSVLSVIN-QDVGGLQVAVWRDVAPTGT--LLVNLGDMARAISGDAYCSV  
RHRV-AA-AERLSLCYFAFPQDDAVIS---YRPFTYEFREQ

>KQK21235

LPVIDLAPACRAAMVRAASEWGGFFQVTN--HGVQP--LLDELHGQQLRAF-RRPFHRKL  
APRWGNP-TATHQLSWSERVI-HEVSAAMSKLARRILSVLAA-EHETTCFLRLNRYPPA  
-P-LGLCGHTDSDFTILR-QDVGGLQLRWRTVRPPGA--LTVNVGDLLQAWTNDVYASV  
EHRV-VA-RERFSVAFFLCPSYDTLIRPPLYRNFTFEYRSQ

>LOC\_Os07g01340.1

LPVIDLAGVCRADMVRAASEWGGFFQVTN--HGVPPA--LLRELHDAQVAVF-RRPFQEKV  
TERWGTP-TAKEQLSWSEAVI-EEVSRAMYELAQKLAELMR-GLREETCFLRLNRYPPC  
-A-FGLCPHTDSDLLTIVHQQQVGGGLQLRWVAVKPPST--LIVNVGDLLQAWSNDVYKSV

EHRV-MA-LERFSMAFFLCPSYHTLIIPSSYRSFTFEYRKQ  
>KQK85900  
LPVIDLGSQCRAAIVRAASEWGFFQVTN--HGVPQP--LLDELHDAQVAVF-RRPFERKL  
RERWGTP-TATEQLSWSE-VI-EEVSTAMSKLALQLAGILVA-DLTRNTCFLRLNRYPPAC  
-G-FGLCPHTDSDFTILH-QDVGGGLQLRWVAVKPPGA--LIVNVGDLLQAWSNDRYRSV  
EHRV-MA-SERFSVAFFLCPAYDTLIRPRSYSFTFEYRNQ  
>Zm00001d018617\_P001  
LPVIDLSSQCRASIVRAASEWGFFQVTN--HGVPQV--LLDELHQAQAGVF-RRPFQLKA  
HQRWGTP-TATEQLSWSELVV-EEVSTAMSKLAQRLAGILVA-ELTRSTCFLRLNRYPPC  
-AVYGLCPHSDSDFTILH-QDVGGGLQLQWVAVKPPGA--LIVNVGDLLQAWSNDRYRSV  
EHRV-MA-RERFSAAFFLCPSYDTLIRPRCYESFTFEYRNQ  
>EER95722  
LPVIDLSSCRAS-IVRAASEWGFFQVTN--HGVPQA--LLDELHQAQVAVF-RRPFHLKA  
SQRWGTP-TATDQLSWSELVV-EEVSTAMSKLAQRLAGILVA-DLTRSTCFLRLNRYPPC  
-P-YGLCPHTDSDFTILH-QDVGGGLQLRWVAVKPPGA--LIVNVGDLLQAWSNDRYRSV  
EHRV-MAARERFSVAFFLCPSYDTLVRPRCYESFTFEYRNQ  
>HORVU2Hr1G090030.9  
XXXXXXXXXXXXXXXXXXXXXXXXXXXX--XXXXXX--XXXXXXXXXQARLF-RLPFDKE  
KARWGNP-TATRHLSWSEYVLTSEXAAAAAAAAAAAAAAAAXXXXXXXLRLNRYPPAC  
-P-FGLVPHTDSDFTILC-QDVGGGLQLRWVAVKPPDA--LIVNVGDLFQAWSNNRYKSV  
EHKV-VA-AERFSVAYFLCPSYDSPVGTCSYRPFTFEYRRK  
>LOC\_Os02g41954.1  
LPMIDVGCCAAA-IAAAAAEWGFFQVVN--HGVAQE--LLEAMRREQARLF-RLPFEAKS  
SARWGTP-TATRQLSWSEDVT-REVADAMSRLARALARVLAE-SLDDATCFLRLNRYPPC  
-P-FGLVPHTDSDFTVLC-QDVGGGLQLRWVAVKPPGA--LIVNIGDLFQAWSNNRYKSV  
EHRV-MT-TERYSVAYFLCPSYDSPIGTCRYKAFTEYRRR  
>KQK00433  
LPMIDVGCCAAA-IAGAAEDWGFFQVVN--HGVKQE--LLEAMRREQTRLF-RLPFEAKA  
TARWGTP-TATAQLSWSEDVT-QEVATAMSKLANTLARVLAE-RLDERTCFLRLNRYPPC  
-P-FGLVPHTDSDFTVLC-QDVGGGLQLRWLAVKPPNA--LIVNIGDLFQAWSNNRYRSV  
EHKV-VT-TERYSVAYFLCPSYDSPIGACEYRTFTFEYRRR  
>KQL30590  
LPMIDVGCCAAA-IARAAEEWGFFQVRN--HGVAPG--LLDAMRREQARLF-RLPFEAKS  
TARWGTP-TATRQLSWSEDVT-REVAGAMSKLAGTLARVLAE-ALDETTCTFLRLNRYPPC  
-P-FGLVPHTDSDFTVLC-QDVGGGLQLRWVAVKPPGA--LIVNIGDLFQAWSNNRYKSV  
EHKV-VT-TERYSVAYFLCPSYDSPIGTCEYRTFTFEYRSK  
>Zm00001d017294\_P001  
LPMIDVGCACAAIARAAEEWGFFQVRN--HGVPQE--LLEEMRREQARLF-RLPFETKA  
TARWGTP-TATRQLSWSEDVT-REVAGAMSKLAGTLARVLAE-ALDETTCTFLRLNRYPPAC  
-P-LGLVPHTDSDFTVLC-QDVGGGLQLSWVAVKPPGT--LVVNIGDLFQAWSNNRYKSV  
EHKV-MT-TERYSVAYFLCPSYDSPIGT--YRTFTFEYRRK  
>KXG30679  
LPMIDVGCACTAAIARAAEEWGFFQVRN--HGVSQE--LLDEMREARLF-RLPFEAKA  
TARWGTP-TATQQLSWSEDVT-REVAGAMSKLAGTLARVLAE-EADETTCTFLRLNRYPPC

-P-FGLVPHTDSDFLTVLC-QDVGGGLQRWVAVKPPGA--LIVNIGDLFQAWSNNRYKSV  
 EHKV-MT-TERYSVAYFLCPSYDSPIGT--YRTFTFEYRRK  
 >HORVU4Hr1G072540.2  
 -----ACADAMARAASEWGFFQVVN--HGVGLE--LLEEMRREQAKLF-RLPFGTKD  
 KARWGNP-TATGQLSWSEGVM-QEVADAMSRVADTVAGTLAE-NLDGTTCLRLNRYPAC  
 -P-LGMVPHTDSDFLTILF-QDVGGGLQRWVAVKPAEA--LIVNVGDLFQAWSNNKYKSV  
 EHKV-VA-AERFSVAYFLCPSWDSPVGT--YKPFTFEYRRS  
 >KQK98136  
 LPLIDLGCACAYAMARAASEWGFFQVTG--HGVGRA--LLERLRAEQARLF-RLPFETKA  
 RARWGAP-TATRHLWSEGVM-QEVADAMSRVAKTVAVALAG-SLDETTCLRLNRYPAC  
 -P-FGLVPHTDSDFLTVLC-QDVGGGLQRWVAVKPPDA--LIVNIGDLFQAWSNNRYKSV  
 EHKV-VA-AERFSAAYFLCPSYDSPVGT--YRSFTFEYRRM  
 >Zm00001d002999\_P001  
 LPLIDLTCCADA-MARAASEWGFFQVTG--HGVSR--LLERLRAEQARLF-RLPFETKA  
 KARWGAP-TATRHLWSEDVV-QEVADAMSRVAKTVAVALAGSLLGETTCYLRLNRYPAC  
 -P-FGLVPHTDSDFLTVLS-QDVGGGLQGWVAVKPPDA--LIVNIGDLFQAWSNNLYKSV  
 EHKV-VA-AERFSAAYFLCPSYDSLVT--YRDFTFEYRRK  
 >KXG26736  
 LPLIDLSCCADA-MARAASEWGFFQVTG--HGVSR--LLERLRAEQARLF-RLPFETKA  
 KARWGAP-TAARHLWSEGVM-QEVADAMSRVAKTVAVALAG-SLDETTCYLRLNRYPAC  
 -P-FGLVPHTDSDFLTVLC-QDVGGGLQRWVAVKPPDA--LIVNIGDLFQAWSNNRYKSV  
 EHKV-VA-AERFSAAYFLCPSYDSPVGT--YRDFTFEYRRK  
 >LOC\_Os04g44150.1  
 LPMVDLERACAGAMARAASEWGFFQLTN--HGVGRE--LMEEMRREQARLF-RLPFETKE  
 KARWGNP-TATRHLWSEGVM-QEVAEAMSRVANTVAAALAE-ELDETTCLRLNRYPAC  
 -P-FGLVPHTDSDFLTVLC-QDVGGGLHLRWVAVRPPDA--LVVNIGDLFQAWSNNRYKSV  
 EHKV-VA-TDRLSVAYFLCPSYDSLVT--YRAFTFEYRKK  
 >KQJ83649  
 LPMIDIECCADA-MARAASEWGFFQVTN--HGVGKE--LLEEMRKEQARLF-RLPFETKR  
 KARWGNP-TATRQLSWSEGVM-QEVADAMSRVADAVAGALAE-KLDGTTCLRLNRYPAC  
 -P-FGLVPHTDSDFLTILC-QDVGGGLQRWVAVKPPDA--LIVNIGDLFQAWSNNRYKSV  
 EHKV-VA-AERFSVAYFLCPSYDAPVGT--YRSFTFEYRRK  
 >HORVU2Hr1G118350.1  
 VPVVDMRDAAEA-VARASEQWGAFLLEG--HGVPT--LLARVEAGIAGMF-ALPTPEKM  
 RAGYGPP-LIASKNMWSEGVM-EEFLKEMRSLANRLMELFLV-ALESMTETMHLNWYPKC  
 -P-LGLKGHTDSGFFTFVM-QSVPGLHLRWVEVPAPGA--LIVNIGDLFQILTNGRFRSV  
 YHRV-VV-RERISVAYFLIPPADVKKVAPLKYRALTWEAFAN  
 >HORVU3Hr1G022840.8  
 VPVVDMRDAAEA-VALAAQDWGAFLAQ--HGVPLE--LLARVEAAIAGMF-ALPASEKM  
 RAGYGSP-PISSKCMWSEAVM-EEFHREMRVLADKLELFLV-ALETMTATMHLNWYPKC  
 -P-LGLIAHTDSGFFTFVL-QSVPGLQLRWVTVAPGA--MVNVGDLFHILTNGRFRSV  
 YHRA-VV-SDRISLGYFLGPPAHVKVAPLRYRAVTWGVRRK  
 >LOC\_Os01g08220.1  
 VPVVDVGAAAAR-VARAAEQWGAFLLVG--HGVPA--LLSRVEERVARVF-SLPASEKM

RAGYGSP-PISSKLMWSEDVM-EEFHKEMRRLADELLRLFLR-ALERMTATVHLNWYPRC  
 -P-LGLIAHTDSGFFTFVL-QSVPGLQLRWVAVPAPGA--FVVNVGDLFHILTNGRFHSHV  
 YHRA-VV-RDRVSLGYFLGPPPPDAEVAPLPYRAVTWAVRKK  
 >KQL04660  
 VPVVDLREAAVARVARAAEQWGAFLLTG--HGVPAE--LLARVEDRVACMF-ALPAADKM  
 RAGYGSP-PISSKCMWSEDVM-EEFHKEMRALADRLLLEFLR-ALETMTATMHLNWYPRC  
 -P-LGLIAHTDSGFFTFVL-QSVPGLQLRWVAVPAPGA--FVVNVGDLFHILTNGRFHSHV  
 YHRA-VV-LDRISLGYFLGPPPHAKVAPLRYRAVTWGVRRK  
 >Zm00001d039634\_P001  
 VPVVDLGAAPAAVARAAEQWGAFLLTG--HGVPAD--LLARVEDRIATMF-ALPADDKM  
 RAGYGSP-PISSKCMWSEDVM-EEFHKHMALADKLLLEFLM-ALETMTATMHLNWYPRC  
 -P-LGLIAHTDSGFFTFVM-QSVPGLQLRWVAVPAPGA--FVVNVGDLFHILTNGRFHSHV  
 YHRA-VV-LDRISLGYFLGPPPHAKVAPLRYRAVTWGVRRK  
 >EES00202  
 VPVVDLAGAVVAQVARAAEQWGAFLLTG--HGVPAE--LLARVEDRIATMF-ALPADDKM  
 RAGYGSP-PISSKCMWSEDVM-EEFHKHMALADKLLLEFLM-ALETMTATMHLNWYPRC  
 -P-LGLIAHTDSGFFTFVL-QSVPGLQLRWVAVPAPGA--FVVNVGDLFHILTNGRFHSHV  
 YHRA-VV-LDRISLGYFLGPPPHAKVAPLRYRAVTWGVRRK  
 >KQJ89115  
 VPVVDLRDVAAM-MARAAEQWGAFLLTG--HGVPAD--LVARVEERIEAMF-ALPASEKT  
 RAGYGSP-PISDKSMWSEEV-EEFHKGMFALAHKLLGLFLS-ALDTMAASMHLNWYPRC  
 -P-VGLIAHTDSGYFTFVL-QSVPGLQLRWVAVPAPGA--FVINVGDLFNIVTNGRFHSHV  
 FHRA-VV-SHRVSLGYFLGPPPAQAVVAPLDYRPVWVGLREK  
 >KQK02988  
 VPVVDMAAAAAAARAAETWGAFLLTG--HGVPES--LLARVEERVAGMF-ALPAPEKM  
 RAGYGSP-PISAKSMWSEEV-EEFHREMRLADKLLGLFLR-ALETMTATTHLNWYPRC  
 -P-LGLIPHTDSGYFTFVL-QSVPGLQLRWVAVPAPGA--FVVNVGDLFSILTNGRFHSHV  
 FHRA-VV-SHRVSLGYFLGPPPAQTRVGPLEYRPVTWTVRRK  
 >LOC\_Os05g08540.1  
 VPVVDMSGAVAA-VARAAEEWGGFLLVG--HGVTAE--ALARVEAQAARLF-ALPADDKA  
 RGGYGVPPYLL-KQMWAESAM-EEYDSSMRALGERLLAMFFK-ALETLTSTIHLNMFPRC  
 -P-VGLAAHTDSGFFTFIL-QSVPGLQLRWVTVPGPGA--LIVVVGDLFHVLTNGRFHSHV  
 FHRA-VV-RDRISMPYFLGPPADMKVTPLVYQAVTWAVRDK  
 >KQL13797  
 VPVVDLGGVARAAAGRAAEEWGAFLLVG--HGVAAG--VAARVEEQVARLF-ALPAAEKA  
 RAGYGRAPRLNSNHMWSEDVM-EEHHAEMRALGVRLLDMLFG-ALETLTATTHLNMYPRC  
 -P-IGMAAHTDSGFITIL-QSVPGLQLRWVTVPPPGA--LVVVLGDLFQVLTNGRFRSA  
 LHRA-VV-RDRISVPYFLGPPADMKVAPLAFRGVTWEIREK  
 >Zm00001d037627\_P001  
 VPVVDMGVATRA-LARAADEWGVFLLVG--HGVPRE--VAARAAEQVARLF-VLPAPDKA  
 RAGYGRP-PLASKLMWSEDVM-EEYDREMRLGGRLLDLFFM-ALETWTATMHPILYPRC  
 -P-IGLTAHTDSGFITIL-QSVPGLQLRWVTVPPPGA--LIVMLGDLFQVLTNGRFRSP  
 IHRA-VV-RERISVPYFLCPPEDMTVAPLAFAVTVWEVKHK  
 >KXG21453

VPVVDMGMAARA-VARAAEEWGAFLLVG--HGVPRG--VAARAEQVARLF-ALPAPDKA  
RAGYGMP-PLASKLMWSEDVM-EEYDREMRLGGRLLDLFFM-ALDNLTTAMMHPILYPKC  
-P-MGLAPHTDSGFITLIT-QSVPGLQLRWVTVAPGA--FVVVLGDLFQVLTNGRYRSA  
LHRA-VV-RDRISVPYFLGPPDGMKVAPLAFRAVTWELKHK  
>KQK10911  
MPVVDVGVAVAQ-VAAAGATHGFFQVSG--HGVDAA--LARAALDGASDFF-RMPLADKQ  
RAGY TSA-HADTKLPWKERVY-QEYCEKMKELSLTIMELLE-SLADSSSIMRCNYYPPC  
-P-LGTGPHCDPTALTILL-QDVGGLEVDWRPVRPPGA--MVINIGDTFMALSNGRYKSC  
LHRA-VV-QERRSLAFFLCPRQDRVVRPPLYPDFTWRFTQR  
>HORVU3Hr1G090980.3  
VPVVDVGVAVAQ-VASACATHGFFQVSG--HGVDNA--LARAALDGASGFF-RLPLAEKQ  
RAGY TSA-HADSKLPWKERVY-QEYCGKMKELSLRIMELLE-SLADSSSIMRCNYYPPC  
-P-LGTGPHCDPTALTILL-QDVGGLEVDWRPVRPPGA--MVINIGDTFMALSNGRYKSC  
LHRA-VV-QERRSLAFFLCPREDRVVRPPYPDFTWRFTQR  
>LOC\_Os01g66100.1  
MPVVDVGVAQAQ-VAAACATHGFFQVSE--HGVDAA--LARAALDGASDFF-RLPLAEKR  
RAGY TSA-HADSKLPWKERVY-QKYCEEMKELSLTIMELLE-SLADSSSIMRCNYYPPC  
-P-LGTGPHCDPTALTILL-QDVGGLEVEWRPVSPPGA--MVINIGDTFMALSNGRYKSC  
LHRA-VV-RERRSLAFFLCPREDRVVRPPYPDFTWRFTQR  
>KQL08016  
VPLVDVGVAQAQ-VAAACATHGFFQVCG--HGVGAD--LARAALDGASDFF-RLPLAEKQ  
RAGY TSA-HADSKLPWKERVY-QRYCEEMKALSLTIMELLE-SLEDSSSIMRCNYYPPC  
-P-LGTGPHCDPTALTILL-QDVGGLEVDWRPVRPPGA--MVINIGDTFMALSNGRYKSC  
LHRA-VV-QERRSLAFFLCPREDRVVRPPAYPDFTWRFTQR  
>Zm00001d012212\_P001  
VPMVDVGVAQAQ-VAAACATHGFFQVCG--HGVDAA--LGRAALDGASDFF-RLPLAEKQ  
RAGY TSA-HADAKLPWKEVVY-QRYCEEMKELSLTIMELLE-SLEDSSSIMRCNYYPPC  
-P-LGTGPHCDPTALTILL-QDVGGLEVEWRPVRPPGA--MVINIGDTFMALSNGRYKSC  
LHRA-VV-RARRSLAFFLCPREDRVVRPPAYPDFTWRFTQR  
>Zm00001d042611\_P001  
VPVVDVGVAQAQ-VAAACATHGFFQVCG--HGVDAA--LGRAALDGASDFF-RLPLAEKQ  
RAGY TSA-HADSKLPWKERVY-QRYCEEMKELSLTIMELLE-SLEDSSSIMRCNYYPPC  
-P-LGTGPHCDPTALTILL-QDVGGLEVEWRPVRPPGA--MVINIGDTFMALSNGRYKSC  
LHRA-VV-QERQSLAFFLCPREDRVVRPPAYPDFTWRFTQR  
>OQU87995  
VPVVDVGVAQAQ-VASACATHGFFQVCG--HGVDAA--LGRAALDGASDFF-RLPLADKQ  
RAGY TSA-HADSKLPWKERVY-QRYCEKMKELSLTIMELLE-SLEDSSSIMRCNYYPPC  
-P-LGTGPHCDPTALTILL-QDVGGLEVEWRPVRPPGA--MVINIGDTFMALSNGRYKSC  
LHRA-VV-QERRSLAFFLCPREDRVVRPPAYPDFTWRFTQR  
>LOC\_Os05g34854.1  
VPVVDLAAVAQ-VAAACASHGFFQVSG--HGVPPS--LARAALDGAAGFF-RLPPAAKQ  
RAGYTAA-HADDNLPWKEEVY-QEYCEAMEEVTKAIMAVLGE-SLEDSSSIMRCNYYPPC  
-P-LGTGPHCDPSALTIVLL-QDVGDLQVAWRPVRPPGA--FVVNIGDTFMALTNGRYKSC  
LHRA-VV-QERRSLAFFLCPREDRVVRPPAYPDFTWRFTQR

>EES19547

APVVDVGAAAEL-VSGACSSHGLFQVTG--HGLDPA--LARAALDGAAGFF-RLPLATKQ  
RAGYTAA-HADANLPWKEGVVYQNYCNAMKEVSLAIMEVIGV-SLADGSSIMRCNYYPPC  
-P-LGTGPHCDPSALTVLL-QDVDGLQVEWRTVRPPGA--LVVSIGDTFMALSNGRYSRSC  
LHRA-VV-RERRSLVFFLCPRDRVVRPPYPDFTWRFTQR

>KQK06181

VPVVDLAAAAAQ-AAAACASHGFFLVGT--HGVDPA--LARAALDGAAGFF-RLPLATKQ  
RAGYAAA-HADANLPWKEEVY-QEYCGAMEAASLAIMEVLGV-SLADGSSVMRCNYYPPC  
-P-LGTGPHCDPSALTLLM-QDVDGLQVGWRPVRPPDE--LVVNIGDTFMALSNGRYKSC  
LHRA-VV-RERRSLAYFLCPRKDRVVRPPYPDFTWRFTQR

>HORVU1Hr1G063780.2

VPVVDIGAAAAQ-VAEACASHGFFQVTG--HGVDPA--LAQAALDGAADFF-RLPLATKQ  
RAGYASA-HADAKLPWKEEVY-QEYCEAMEDASLAIMEVLGV-SLADGSSIMRCNYYPRC  
-P-LGTGPHCDPSALTILL-QDVDGLQVAWRSVRPPGE--LVVNIGDTFMALSNGRYKSC  
LHRA-VV-KERRSLAYFLAPQEDRVVRPPYPDFTWRFTQR

>HORVU3Hr1G089980.1

VPVVDLAGAGLNELVAACERHGFFQVVN--HGVDPA--LLAKAYRCCDAFY-ALPLAEKQ  
RAGYAGS-FVGSKL PWKEDVW-QEYCNEMTRLALDVTEVLAA-CLAGDDSLMRLNHYPYC  
-K-LGTGPHHDPTALTLLH-QDVGGLEVAWRAVRPSDA--FVVNIGDTFSALTNGRHVSC  
LHRA-VV-LARRSLTFFLNPLDRPVTTPAYPDFTWEFTQK

>KQL22579

IPVVDLAEPLVG-MAEACERHGFFQVVG--HGVGAE--LIAEAYRCCDAFY-AHPLAEKQ  
RAGYASS-FTGSRLPWKEEVY-QEYCDAMTRLALDVTEVLAA-ALAGGDSVMRLNHYPYC  
-R-LGTGPHRDPTSLTLLH-QDVGGGLQVEWLAVRPADA--FVVNIGDTFAALTDGRHASC  
LHRA-VV-AARRSLAFFLNPLDRVVCPEYPDFKWEFTQK

>Zm00001d007894\_P001

IPVVDLGELPRG-VAEACERHGVFQVVN--HGVGAA--LLAEAYRCCDAFY-ALPLADKQ  
RAGYASS-FTGCCLPWKEEVY-QEYCDAMTRLALDVTEVLAA-ALEGGDSVMRLNHYPAC  
-R-LGTGPHRDPTSLTLLH-QDVGGGLQVPWRAVRPADA--FVVNIGDTFAALTDGRHTSC  
LHRA-VV-GSRRSLAFFLNPLDRVVRPPGFPDFTWEFTQK

>EER95912

IPVVDLGELPRG-VAEACERHGFFQVVN--HGVPAA--LLADAYRCLDAFY-ARPLADKQ  
RAGYASS-FTGSCLPWKEEVY-QEYSDAMARLAMDVTEVLAA-ALDGGDSIMRLNHYPAC  
-R-LGTGPHRDPTSLTLLH-QDVGGGLQVEWRAVRPADA--FVVNIGDTFAALTDGRHASC  
LHRA-VV-RARRSLAFFLNPLDRVVRPPDFPDFTWEFTQK

>LOC\_Os07g07420.1

IPVVDLAAIGRD-VAEACERHGFFQVVN--HGVDPA--LLAEAYRCCDAFY-ARPLAEKQ  
RAGYASS-FTGCKLPWKEEVY-QEYCDVMTRLALDVTEVLAV-ALADGDPVMRLNHYPYC  
-R-LGTGPHRDPTSLTLLH-QDVGGGLQVGWRAVRPADA--FVVNIGDTFAALTNGRHASC  
LHRA-VV-VARRSLTFFLNPLDRVVSPPFPDFTWEFTQR

>KQK20711

IPVIDLAAGEDH-FAAACERHGFFQIVN--HGVDPS--LLAEAYRCMDAFY-ALPLAEKQ  
RAGYAGS-FTGSRLPWKEEVW-QGYCDVMTRLAQDVTDLLAV-GLAGGDSVMRLNNYPPC  
-R-LGTGPHRDPTSLTLLH-QDVGGGLQVEWRAVRPEDA--FVVNIGDTFAALVDGRHASC

LHRA-VV-AAARRSLTFFLNPPPLDRVVSPPYPDFTWEFTQK  
>KQK20710  
IPVIDLAAGADH-FAAACERHGFFQIVN--HGVDPA--LLAEAYRSMDAFY-ALPLAEKQ  
RAGYAGS-FTGSRLPWKEEVW-QEYCDVMTRLALDVTDLLAV-GLAGGDSVMRLNNYPPC  
-R-LGTGPHRDPTSLTLLH-QDVGGGLQVEWRAVRPEDA--FVVNIGDTFAALVDGRHASC  
LHRA-VV-AAARRSLTFFLNPPPLDRVVSPPQYPGFTWEFTQK  
>LOC\_Os03g63970.1  
VALIDVGAVVRQ-VGEACERHGFFLVVN--HGIEAA--LLEEAHRCMDAFF-TLPLGEKQ  
RAGYASS-FTGSKLPWKEEVY-SRYCHEMSRSLSELM EVLGE-SLQRNDSIMRLNYPPAC  
-Q-LGTGPHCDPTSLTILH-QDVGGGLEVRWRAIRPPGA--LVNVVGDTFMALS NARYRSC  
LHRA-VV-APRRSLAFFLCPEMDTVVRPEYPDFTWDFTQR  
>KQK86097  
VPLIDLSGVVRQ-VGDACGLHGFFQVVN--HGIDPA--LLAEAHRCMDTFF-TLPLADKQ  
RAGYASS-FTGSKLPWKEEVY-GRYCSEMSRSLSELM EVLGE-SLEGNDSIMRLNYPPC  
-Q-LGTGPHCDPTSLTILH-QDVGGGLQVRWRSIRPAGA--FVVNIGDTFMALSNGR YRSC  
LHRA-VV-VPRRSLAFFLCPEMDKVVVRPPGYPDFTWDFTMR  
>Zm00001d034898\_P001  
VPLIDLSGVVRQ-VRRACDLHGFFQVVG--HGIDAA--LTAEAHRCMDAFF-TLPLPKQ  
RAGYASS-FTGSKLPWKEEVY-GRYCSEMSRSLSELM EVLGE-SLQGNDSIMRLNYPPC  
-Q-LGTGPHCDPTSLTILH-QDVGGGLQVAWRSIRPPGA--FVVNIGDTFMALSNGR YRSC  
LHRA-VV-VARRSLAFFLCPEMDKVVVRPPKYPDFTWDFTMR  
>EER90481  
VPLIDLSGVVRQ-VRRACDLHGFFQVVN--HGIDDA--LLQEAHRCMDAFF-TLPMSDKQ  
RAGYASS-FTGSKLPWKEEVY-GRYCSEMSRSLSELM EVLGE-SLQGNDSIMRLNYPPC  
-Q-LGTGPHCDPTSLTILH-QDVGGGLQVRWRSIRPPGA--FVVNIGDTFMALSNGR YRSC  
LHRA-VV-VPRRSLAFFLCPEMDKVVVRPPAYPDFTWDFTMR  
>KQK12006  
VPLIDIGGSVARLVGDACSRHGFFQVVN--HGIDAA--LLADAHRCVDAFF-KLPLAEKQ  
RAGYASS-FVGSKLPWKEEVY-ARYCEEMSRVSLEIMEVLGE-SLEGNDSIMRLNYPPC  
-Q-LGTGPHCDPTSLTILH-QDVGGGLQVRWRAIAPQDA--FVVNIGDTFMALSNGR YKSC  
LHRA-VV-VPRKSLAFFLCPEMDKTVAPPGYPDFTWDFTQK  
>HORVU5Hr1G124120.2  
VPLIDIGGVTRL-VGEACERHGFFQVVN--HGIDAQ--LLADAHRCVDAFF-TMPLPEKQ  
RAGYASS-FTGSKLPWKEEVY-ARYCSEMSRSLSEIMEVLGE-SLEGNESIMRLNYPPC  
-Q-LGTGPHCDPTSLTILH-QDVGGGLQVRWRSIRPADA--FVVNIGDTFMALSNGR YKSC  
LHRA-VV-VPRKSLAFFLCPEMDKVVAPPGYPDFTWDFTQK  
>LOC\_Os01g22910.1  
SGDGDSGRQRR-IRRWGGLWRWIRRRG---GAAAA--CEEVEGRRRIRRWGLRWLARR  
SSGAAADPAMGTAFPLALQVV-NDYVEAVRQLACHVLDLLGE-GLTDNDSLIRINHYPPS  
CA-IGFGEHTDPQILSVLR-ANADGLQLVWVPVPPSA--FFVNVGDLLQALTNGRLVSI  
RHRV-VV-KPRLSTIYFAAPPLHARISALPYRAFTWEYKRT  
>LOC\_Os05g06670.1  
IATVDMSAVARQ-VATACAAHGFFRCVG--HGVPAAAPVAARLDAATAAFF-AMAPAEKQ  
RAGYGCR-SIGGDVGELESAIVNEYIEAMKKLACEILDLLGE-GLADSDCLLRINHYPPS

-C-IGFGEHSDPQILSLLR-ANVEGLQVMWVQVPSPA--IFVNVGDVLQALTNGRLISI  
RHRV-IA-RPRLSTIYFASPPLHARISALPYRSFTWEYKTT  
>KQK99291

-----  
-----TVV-NEYVGAVRQLACEILDLLGE-GLTDSDSLRLINHYPPA  
-C-IGFGEHSDPQIISLLR-ANVNGLQVWVWIKVPAPSA--FFVNVGDLLQALTNGKLVSV  
RHRV-IA-RPRLSTIYFAAPPLHAQISALPYRSFTWEYKKT  
>Zm00001d024175\_P001  
IPTVDLSALSRLQ-VVRACAEHGFFRAVN--HGVPPG--PAARLDAAARTFF-ALAPRDKQ  
RAGYGCR-SIGGDAGELENNV-NEYVGAMRQLACEILDLLGE-GLTDSDSLRLINHYPTA  
-C-VGFGEHSDPQILSLLR-ANVDGLQVWVWQVPAQSA--FFVNVGDLLQALTNGKLVSV  
RHRV-IA-RARLSTIYFAAPPLHARILALAYRPFTWEYKKT  
>Zm00001d037565\_P002

IPTVDLSALSRLQ-VARACAQHGFFRAVN--HGVAPG--PAARLDAAARTFF-ALAPHNKQ  
RAGYGCR-SIGGDAGELENNV-NEYVGAMRQLACEILDLLGE-GLTDSDSLRLINHYPPP  
-C-IGFGEHSDPQILSLLR-SNVDGLQVWVWQVPAPSA--FFVNVGDLLQAFTNGKVISV  
RHRV-IA-RARLSTIYFAAPPLHARILALPYRPFTWEYKKT  
>OQU77483

IPTVDMSALSRLQ-VARACAQHGFFRAVN--HGVAAG--PAARLDAAARTFF-ALPPHDKQ  
RAGYGCR-TIGGDAGELENNV-NEYVGAMRQLACEILDLLGE-GLTDSDSLRLINHYPPA  
-C-IGFGEHSDPQILSLLR-SNVDGLQVWVWQVPSPA--FFVNVGDLLQALTNGKVISV  
RHRV-IA-RARLSTIYFAAPPLHARILALPYRPFTWEYKKT  
>KQK07366

IPTVDMSALSRLQ-VARACAEQGGFFRAVN--HGVPAP--AARQLDAATAAFF-ALPAHEKQ  
RAGYGCR-TIGGDVGELESCVVNEYVEAVKQLACDILDLLGE-GLPDSDSLRLINHYPPS  
-C-IGFGEHSDPQILSLLR-ANVDGLQVWVWQVPASSA--FFVNVGDLLQALTNGKLLSV  
RHRV-IA-RPRLSTIYFAAPPLHARISALPYRSFTWEYKTT  
>HORVU1Hr1G023460.3

IPTVDMSALSRLQ-VARACAEQGGFFRAVN--HGVPAG--PPARLDAATSFAFF-ALAAHDKQ  
RAGYGCR-SIGGDVGELESVV-NEYVEAVKQLACDILDLLGE-GLADSDSLRLINHYPTK  
AG-IGFGEHSDPQLSLLR-ANVDGLQVAWIQVPASSA--YFVNVGDLLQALTNGRLVSI  
RHRV-IA-RPRLSTIYFAAPPLHARISALPYRSFTWEYKTA  
>KQL05037

IPTVDMSALARR-LVRACAERGFFKAVN--HGVPAR--AAARLDAAASFAFF-ARPARAKQ  
AAGYGSR-NIGGDVGELESVAVNEYVDVRRACRVLDLLGE-GLVDSDSLRLINHYATS  
AA-IGFGEHTDPQILSVLR-ANVDGLQVEWVPVPAPAA--FFINVGDLQALTNGRLVSI  
RHRV-MA-RPRLSTIYFAAPPLRALIAALPYRPFTWEYKKA  
>Zm00001d040737\_P001

IPTVDMSALARR-LVRACAERGFFKAVN--HGVPPR--VSARLDAATSFAFF-ARPAPVKQ  
AAGYGSR-NIGGDVGELESVAVNEYVDVRRACRVLDLLGE-GLVDSDSVLRINHYPTS  
-S-IGFGEHTDPQILSLLR-ANVDGLQVQVWQVPAPSA--FFINVGDLQALTNGRLVSI  
RHRV-MA-RPRLSTIYFAAPPLDARIAALPYRTFTWEYKKA  
>EES02896

IPTVDMSALARR-LVRACAERGFFKAVN--HGVPPR--VSARMDAAASFAFF-ARPGQAKQ



AAGYGSR-NIGGDVGELESVAVNEYVGAVRHLACRVLDLLGE-GLVDSDSLRLINHYPTS  
RS-IGFGEHTDPQILSLLR-ANVDGLQVQWVQVPAPSA--FFINVGDLLQALTNGRLVSI  
RHRV-MA-RPRLSTIYFAAPPLDARVAALPYRTFTWEYKKA  
>KQK04223  
IPTVDMSALSQR-MVEAFAERGFFKAVN--HGVPFR--APATLDAATAAFF-ERPAPEKQ  
AAGYGSR-SIGGDVGELEEAV-NEYVGAVRRLACQILDLLGE-GLSDSDSIIRINHYPPS  
SA-VGFGEHSDPQILSVLR-ANVDGLQVTWVQVPAPAA--FFINVGDLLQALTNGRLVSI  
RHRV-MA-KPRLSTIYFAAPALHALISALPYRPFTWEYKKN  
>HORVU7Hr1G101720.1  
IPTIDMSAMSRQ-MVEAFAERGFFKAVN--HGVPFR--ASARLDAASAAFF-ARPAEEKQ  
EAGYGSR-SIGGDVGELEEAV-NEYVQAVRHLACRILDMLE-GLTDGDSLVRINHYPPAS  
AA-VGFGEHTDPQILSVLR-ANVDGLQVAWVQVPAPAA--FFINVGDLLQALTNGKLVSI  
RHRV-MA-KPRLSAIYFAAPALHERISAFYRPFTWEYKKT  
>HORVU3Hr1G029010.7  
AGLLQGDRAAGARARRGGGRGVLRAAAGREGGRRR--PAARVRQQADRRL-RRPRVDR-  
--RRAAR-RLAVRGRRRDLL-EEYAAVRRMACGVLELMAE-GLGESDNMLRVNHYPPR  
-P-TGFGEHTDPQIISVLR-SNTSGLEI EWTSVPPDA--FFVNVADALQVLTNGRFSV  
KHRG-----WW-----  
>LOC\_Os05g11810.1  
QPEKEAAAAAA-----  
--GYGSK-RIGGDLGWVEDIL-NEYVVAVRAMMWEVLKLMAE-GLEESDSVLRVNHYPPH  
-P-TGFGEHTDPQIISVLR-SNTSGLEISWASVPPRKS--FFVNVGDVLQ--PGGRIKGF  
LHAV-SL-RPAAGLLSLASPTSPPEQPPAFYPLQHNRRRG  
>KQK03260  
VQAVDLSSAARA-LVAACEEQGFFKVTG--HGVAPA--LVRALDAAAAAFF-ALPQAEKE  
AAGYASK-RIGGDLGWIEGL-EEYAAALRRMACEVLELMAE-GLGGSDNMLRVNHYPPR  
-P-TGFGEHTDPQIISVLR-SNTSGLEIAWASVPPADS--FFINVGDVLQVLTNGRFRSV  
KHRV-VV-RPRMSMIFFGGPPPGERLAPLRYREFTWEYKST  
>LOC\_Os01g11150.1  
VRAIDLSAARA-LVAACEEQGFFRVTG--HGVPFG--LVRAAEAAAARFF-ALPQPDKE  
AAGYASK-RIGGDLGWIEEL-REYSAVRRMACAVLELMEE-GLEDSDCVLRVNHYPPR  
-P-TGFGEHTDPQIISVLR-SNAPGLEIAWASVPHGDGDSFFVNVGDTLQVLTNGRFRSV  
KHRV-VV-KSRVSMVFFGGPPPGERLAPLPYREFTWEYKGS  
>KQL04928  
VRSVDLSAARA-LVAACEEHGFFRVTG--HGVPVE--LVRSAEAAAAGFF-ALPQGVKE  
E-GYGSK-QIGGDLGWIEDLL-DEYTVAVRRMACAVLELMEE-GLEDSDCVLRVNHYPPR  
-P-TGFGEHTDPQIISVLR-SNTSGLEIAWASVPPGDA--FFVNVGDTLQVLTNGRFRSV  
RHRV-VV-RSRVSMIFFGGPPPGERLAPLPYLEFTWEFKTS  
>Zm00001d008909\_P002  
VRSVDLSAARA-LVAACEEHGFFRVTG--HGVPAR--LVRAAEAAAAGFF-ARPQGEKE  
EEGYGSK-RIGGDLGWVEDLL-DEYTVAVRRMACAVLELMEE-GLADSDCMLRVNHYPPR  
-P-TGFGEHTDPQIISVLR-ANTSGLEIAWASVPPGDA--FFVNVGDTLQVLTNGRFRSV  
RHRV-VV-KSRVSMVFFGGPPPGERLGPLPYRDFTWEFKTS  
>Zm00001d039394\_P001

VRSDLSAAARA-LVAACEEHGFFRVGTG--HGVPAE--LVRAAEAAAAGFF-ARPQGEKD  
G-GYGSK-RIGGDLGWVEGLL-DEYTVAVRRMACAVLELMAE-GLADSDCMLRVNHYP  
-P-TGFEHTDPQIISVLR-ANTSGLEVAWASVPPGDA--FFVNVGDTLQVLTNGRFRSV  
RHRV-VV-KSRVSMIFFGGPPPDERLAPLPYRDFTWEFKTS

>EES00081

VRSDLSAAARA-LVAACEEHGFFRVGTG--HGVPPE--LVRAAEAAAAGFF-AQPQDEKD  
EEGYGSK-RIGGDLGWVEDLL-DEYTVAVRRMACAVLELMAE-GLADSDCMLRVNHYP  
-P-TGFEHTDPQIISVLR-ANTSGLEIAWASVPPGDG--FFVNVGDTLQVLTNGRFRSV  
RHRV-VV-KSRVSMVFFGGPPPGERLAPLP-----

>Zm00001d037724\_P002

VPEVDLAAAARA-VAKACEDHGFFKVTG--HGVPPE--LLARLEAAAAAFF-ALPQREKD  
R-GYASK-RIGGDLGWVEAVL-DEYVAVRRMTCTVLQDMAQ-GLRSDSMLRVNHYP  
-A-TGFEHTDPQIISVLR-SNASGLEITWVSPSTES--FFVNVGDALQVLTNGRFRSV  
RHRV-MV-RPRVSVIFFGGPPPRERLAPLPYREFTWEYKNS

>KXG21531

VPEVDLSAAARA-VAKACEDHGFFKVTG--HGVPAP--LLARLEAAAAAFF-ALPQRDKD  
KAGYASK-RIGGDLGWVEDVL-DEYIAVRRMTCTVLELMAQ-GLRSDSMLRVNHYP  
-P-TGFEHTDPQIISVLR-SNTAGLEISWVSPSTQS--FFVNVGDALQVLTNGRFRSV  
RHRV-MV-RPRVSVIFFGGPPPRERLAPLPYREFTWEYKTS

>HORVU1Hr1G029520.3

LPEVDLSVAARA-VAAACEEHGFFKVTG--HGVPPE--LLARVENAAAAFF-ALSQRDKE  
AAGYASK-RIGGDLGWVEDLL-NEYTVAVRRMTCQLLELMAE-GLKESDMLRVNHYP  
-P-TGFEHTDPQIISVLR-SNTSGLEIDWVSPSTQS--FFVNVGDALQVLTNGRFRSV  
RHRV-MV-QPRVSVIFFGGPPPRETLAPLPYKEFTWEYKAS

>KQK07053

VPEIDLAAAARA-VAAACEEHGFFKVTG--HGVASG--LLARVEAAAAADFF-ALPQREKE  
AAGYASK-RIGGDLGWVEELL-DEYTVAVRRMTCEVLELMAE-ALEDSDSMLRVNHYP  
-P-TGFEHTDPQIISVLR-SNTSGLEITWVSPPHTS--FFVNVGDALQVLTNGRFRSV  
RHRV-MV-RSRVSVIFFGGPAPGKTLAPLPYREFTWEYKAS

>KQL07047

VPVVDLSGAARA-IVDACERFGFFKVVN--HGVA--TMDRAETEAIFF-AQAQADKD  
RAGYGSK-RIGGDMGWLEAAL-NEYIAVRKVAVRVLEAMAE-GLQSDQVFRVNHYP  
-P-TGFEHTDPQLVSVLR-SNTSGLQIQWVSPSRDA--FFVNVGDSLQVLTNGRFRSV  
KHRV-VT-KSRVSVIFFGGPPLAQRIEPLPYKEFTWEYKKA

>Zm00001d012712\_P001

VPVVDLSGAARA-IVDACERFGFFKVVN--HGVPAA--TMDVAESEAVGFF-AQAQADKD  
RAGYGSK-RIGGDMGWLESAL-NEYVAAVRDVAARVLEAMAE-GLAGSDQVFRVNHYP  
-P-TGFEHTDPQIISVLR-SNTSGLQVQWVSPSRDA--FFVNVGDSLQVLTNGRFESV  
KHRV-VT-KSRVSVIFFAGPALEQRIAPLAYREFTWEYKTA

>Zm00001d043411\_P001

VPVVDLSSAARA-IVDACERFGFFKVVN--HGVA--TMDRAESEAVRFF-AQAQADKD  
RAGYGSK-RIGGDMGWLESAL-NEYVAAVRKVAARVLEAMAE-GLAGSDQVFRVNHYP  
-P-TGFEHTDPQIISVLR-SNTSGLQIQWVSPSRDA--FFVNVGDSLQVLTNGRFRSV  
KHRV-VT-KSRVSVIFFAGPPLGQRIAPLPYKEFTWEYKKA

>EES01498

VPVVDLSSAARA-IVDACERFGFFKVVN--HGVPAA--TMGRAESEAVRFF-AQAQADKD  
RAGYGSK-RIGGDMGWLESAL-NEYVA AVRKVAVRVLEAMAE-GLAGGDQVFRVNHYP  
-P-TGFGHEHTDPQLISVLR-SNTSGLQIQWVSVPSRDA--FFVNVGDSLQVLTNGRFSV  
KHRV-VT-KSRVSIYFAGPALEQRIVPLPYKEFTWEYKKA

>LOC\_Os01g55240.1

VPVVDLGSAARA-VVDACERYGFFKVVN--HGVATD--TMDKAESEAVRFF-SQTQPD  
RSGYGSK-RIGGDMGWLEAAL-NEYISGVRKVAVRVMEAMSE-GLEGSDQVFRVNHYP  
-R-TGFGHEHTDPQLVSVLR-SNTSGLQIQWVSVPSRDS--FFVNVGDSLQVLTNGRFSV  
KHRV-VA-KSRVSIYFGGPPLAQRIAPLPYKEFTWEYKKA

>KQK09810

MPVIDLCSAPRA-IADACERFGFFKLVN--HGVATD--AMDRLESEAVTFF-SQPQADKD  
RSGYGSK-RIGGDMGWLERAL-NEYIAVRKVAVRVMEAMAE-GLAGSDQVFRVNHYP  
-A-TGFGHEHTDPQLVSVLR-SNTSGLQIQWVSVPSRDA--LFVNVGDSLQVLTNGRFSV  
KHRV-VA-KSRVSLIYFGGPPLTQRIAPLPYTEFTWEYKKA

>HORVU3Hr1G072810.1

MPVVDLSRAPRA-IADACERFGFFKLVN--HGVALD--AMDRLESEAVRFF-SLPQADKD  
RSGYGSK-RIGGDMGWLEAAL-NEYIAVRKVAVRVMEAMAE-GLEGSDQVFRVNHYP  
-H-TGFGHEHTDPQLISVLR-SNTSGLQIHWVSVPSRDA--FFVNVGDSLQVLTNGRFSV  
KHRV-VA-KSRVSMIYFGGPALTQRIAPLPYKDFTEFTWEYKKA

>LOC\_Os05g43880.1

LPVVDLAAAAGE-VVRACERFGFFKVVN--HGVGEG--VVGRLEAEAVRFF-ASPQAAKD  
AHGYGSK-RIGGDMGWLEDA-NKYVGAMRGMARTVLEMVAE-GLAASDQILRLNHYP  
PP-TGFGHEHTDPQLISILH-SNTSGLQVQWVTPPPAS--FLVIVGDSLQVMTNGRMRSV  
RHRV-VA-KSRVSMIYFGGPPLAQRIAPLRYEFTWEYKKA

>Zm00001d038695\_P001

VPAVDLSSAALA-VVDACERFGFFKVVN--HGVPAG--VVDRLAEAEAVRFF-ASPQAAKD  
ACGYGNR-RIGGDMGWLEDAV-NQYVASVRGLATSVLEAVAE-GLAASDQVFRINHYP  
-P-TGFGHEHTDPQLVSVLR-SNTPGLQLRWVPVPPRDA--FFVIVGDSLQVLTNGRLKSV  
RHRV-VA-KPRVSMIYFAGPAPAQRIAPLPYRDFTWDYKKA

>EES19801

VPAVDLSSAALA-VVDACERFGFFKVVN--HGVPTG--VVDRLAEAEAVRFF-ASPQADKD  
ACGYGNK-RIGGDMGWLEDAV-NQYVA VRGLATSVLEAVAE-GLAASDQVFRINHYP  
-P-TGFGHEHTDPQLVSVLR-SNTAGLQVRWVPVPPRDA--FFVIVGDSLQVLTNGRLKSV  
RHRV-VA-KPRVSMIYFAGPAPAQRIAPLPYRDFTWDYKKA

>KQK05406

VPAVDLSAAADD-VVRACERFGFFSVVN--HGVARG--VVERLEHEAALFF-SWPQADKD  
ASGYGSK-RIGGDMGWLEDAI-NEYVGAMRGLARTVLEMVAE-GLEASDQVFRLNHYP  
-P-TGFGHEHTDPQLVSILH-SNTAGLQIKWVSVPPRDA--FFVNVGDSLQVLTNGRLKSV  
RHRV-VARKSRVSMIYFGGPVPAQRIAPLPYREFTWEYKKA

>HORVU1Hr1G076730.2

VPAVDLSSAAAD-VVRACERFGFFSVVN--HGVPAG--VVDRLAEAEAVRFF-ASTQAEKD  
ASGYGSK-RIGGDMGWVEEAI-NAYVSAMRGLARTVLEMVAE-GLEASDQVFRVNHYP  
-P-TGFGHEHTDPQLVSILH-SNTAGLQVRWVSVPPRDA--FFVNVGDSLQVLTNGRLRSV

RHRV-VALKSRVSMIYFAGPPLAQRIAPLQYRDFTWEYKKA

>HORVU1Hr1G086710.2

VPSVDLSAAGAA-VAAACRRVGFFRATN--HGVPAA--LTDALAEAREAEFF-ALPHEDKL  
EAGYGSK-SIGGDVGWLEAAL-EEYTDVREVGARVLELMAD-GLDGADEMVRVNHYP  
-P-TGFGHTDPQIISVLR-SNTGGLQIRWVPVAPPDS--LFVNVGDSLQVLTNGRFRSV  
KHRV-VA-QPRLSVIYFGGPAPTQRIAPLPYRDFTWEYKKA

>HORVU1Hr1G086810.2

VPSVDLSAAAAA-VADACRAVGFFRATN--HGVPAA--LTDALAEERAASFF-ALPHKDKM  
DAGYGSK-NIGGDVGWLE---EEYTDVREVGARVLELMAD-GLGGADEMVRVNHYP  
-P-TGFGHTDPQIISVLR-SNTAGFQIRWVPVAPTDS--LFVNVGDSLQVLTNGRFRSV  
KHRV-VA-QPRLSVIYFGGPAPTQRIAPLPYRDFTWEYKKA

>KQK04908

IPVDLSSAARA-VAEACRGVGFFRATN--HGVPSS--LAATLEADAMAEFF-ALPDKDKQ  
STGYGSR-RIGGDVGWLELAL-HEYTRAVRELSGRVLELMAE-GLGSEELVRVNHYP  
-T-TGFGHTDPQLISLLR-SNTAGYQIRWVNVAPPDS--FFVNVGDTLQVLTNGRFRSV  
KHRVLVAKASRLSVIYFGGPAPAQRIAPLPYRDFTWEYKAA

>KQK04914

IPVDLSSAARA-VADACRGVGFFRATN--HGIPSS--LAAALEARAMAEFF-ALPHEDKV  
DAGYGS-RIGGDVGWLEAAL-EEYTGAVERNASGKVLELMAE-GLGSEELVRVNHYP  
-K-TGFGHTDPQIISLLR-SNTAGLQIPWVNVAPPDS--LFVNVGDCLQVLTNGRFRSV  
KHRV-VA-ASRLSVIYFGGPAPAQRIAPLPYRDFTWEYKAA

>LOC\_Os05g48700.1

IPCIDLSAAAAA-VADACRTLGFATN--HGVPAG--LADALESSAMAEFF-ALPHQEK  
DMGYGSK-SIGGDVGWLEAAV-EAYTGAVRGVGRVLELMAE-GLEGSDMLRVNHYP  
-L-TGFGHTDPQIISVLR-SNTAGLQIRWVPVPPPS--FFVNVGDSLQVLTNGRFRSV  
KHRV-LAEESRLSVIYFGGPAASQRIAPLEYREFTWEYKKA

>KQL14341

IPCVDLSAAAAA-VADACRSVGFFRATN--HGVPAS--VADALEAGAMAEFF-ALPAQDKV  
DMGYGSK-SIGGDVGWLE---EEYTAAREVCGRVLELIAE-GLEGGDELVRVNHYP  
-P-TGFGHTDPQIISVLR-SNTAGLQIRWVPVPPPS--FFVNVGDSLQVLTNGRFRSV  
KHRV-VASHSRLSVIYFGGPAPSQRIAPLPYREFTWEYKRA

>Zm00001d038996\_P001

VPCVDLSAAGAA-VADACRSVGFFRATN--HGVPAR--VADALEARAMAEFF-ALPAQEK  
DMGYGSK-SIGGDVGWLE---EEYTAALREVCGRVLELIAE-GLEGSEVVRVNHYP  
-P-TGFGHTDPQIISVLW-SNTAGLQIRWVPVPPPS--LFVNVGDSLQVLTNGRLRSV  
KHRV-VA-RSRLSVIYFGGPAPSQRIAPLPYREFTWEYKRA

>EES19940

IPCVDLSAAAAA-VADACRGVGFFRATN--HGVPAR--VVEALEARAMAEFF-ALPAQEK  
DMGYGSK-RIGGDVGWLE---EEYTAAREVCGRVLELIAE-GLEGSDMLRVNHYP  
-P-TGFGHTDPQIISVLR-SNTAGLQIRWVPVPPPS--FFVNVGDALQVLTNGRFSV  
KHRV-VAAQSRLSVIYFGGPAPSQRIAPLPYREFTWEYKTA
