# Supplementary material for: Genome-Wide Identification and Evolution Analysis of the Gibberellin Oxidase Gene Family in Six Gramineae Crops
Source: MDPI journal article supplement (doi:10.3390/genes13050863), 2022-05-12
Supplement: s1 [file s1]

>KQJ85786

-----  
-----MEQRRAESPI  
PADGAAA--SKLEEL-----ELPTLDLEE  
S-----GLTEALAAACRDLGVFRLAN--HGI----  
PAD--LSDRLFSLTRHLL-EEPDAEKKAK-----LPG-----YFSGTP-ALS  
LRV--KELNWVEG-----FHV-----APAAADADPDPT-----  
--AADDIGGEFGSFR-----EVT-AEYVSRMAR  
IARKLFDAMDL-GL----D-----AS-----QRASYL-----AEHDGTFRA  
YRYPAC-PAG-----GH--IGMEAHTDSSVLSILNQ  
QD---LQESSLQVLLRPQ-----G-----TWRSVQP---VEGT--LVVNIGDM  
MQAITGDAYR----SVEHRV-VP-----L--PD-TDRMSLCYFAFPQDDAVISGCG--  
---ED-----DGE----KGSC---YRPFSY-----REFREQVQADIK-----  
-----ATGAK-----VGLARF  
RRGASAPELASAIGTEAGL-----  
>HORVU3Hr1G117870.1

-----  
-----MDRQPVEC  
-----GLEEV-----ELRAVDLEAE  
E--S-----ILTEELAAACRDPGVFRLVN--HGV----  
PSN--LTARLLALARGLL-ELDAATKSR-----LPG-----YFCGTP-ALA  
ALPV-KEPNWLEG-----LHV-----EAAGDTCLCS-----  
--PDGGSAAVEF-----MEAVSGEYVAHMAR  
IARKVFDTLASGEL---G---L---D---SE-----QRATYL-----TERGCIFRA  
YRYPAA-AAS-----GQ--VGMEAHTDSSVLSILN-  
QD---T-VGGLQVL--YR-----G-----CWRAVRP---VEGA--LVNVGDM  
LQAMSGDAYR----SPEHRV-VA-----P--AG-ADRMSLCYFAFPPEEEAVIVGGRWR  
GRSSS-----GGE----Q-RETRRYQGFSY-----REFREQVQADVK-----  
-----ATGSK-----VGLARF  
RVAVASQ-----  
>LOC\_Os04g33360.1

-----  
-----MGWASAAATCGR LQPGGGGGESSSTTTTRTTQMD  
PSCPPFP---QPEAP---PLPLQLQLQPGLPR-----LELPTDLERV  
G--G-----EDRAALVAACRDLGAFRVFN--HGV----  
PGE--LRRRLLELGKQLGRDTFELKKA-----RPG-----YFWGTAALKS  
LRV--KEVNWLEG-----LHV-----DLVPGSSSSSSQVG-----  
--DGDDDDDDGWMRIR-----ALM-AEYGDHMAR  
IARKLFDALAA-EL----G---L---D---HH-----QAASYL-----AERQGFLRL  
YRYPAC-PSS-----A-SC--LGMEPHTDSSVLSIILG  
QD---H-VGGLQVI--RD-----G-----AWRDVAP---APGE--LLVNLGDM  
MTAISGGSYQ-----SVRHRV-LA-----S--RPSTERVSCCYFAFPQEDAVVEAPS--  
----G-----IGG-----GV---YRPFSY-----REFREQVQADIK-----  
-----AVGTK-----VGLSRF

YATATRYTR-----  
>KQL09066  
-----  
-----MAVESSETPC  
PPFPLIGDEDDVGGHENQAAAEVPQGEA-----LELPTVDLEAP  
G-----PA---LDAACRGLGIFRLAN--HGV----  
PAD--LTARLFALARDLLGRTPFPEKKA-----QPG-----YFWGTPEEPS  
RRVRPRDVNWIEG-----YHV-----HLAQPRPIAVGP-----  
--PPPSDDDPAL-----GDLV-AEYADHMAR  
VARRLFDAIAE-AL----C---L---D---AD-----RTASYI-----NEHGGYLRV  
HRYPRC-PEP-----GH--HGIQAHTDSTTLSIIN-  
QDAASGGSGGLQVH--HD-----G-----AWRDLAAPGVPDDGA--LLVNLGDM  
AKAISADAYR-----SVPHRV-VA-----S--MGDDERLSLCYFAFPRDDAVS-----  
-----CDG-----SR---YRPFTV-----PEFRAQVQADLK-----  
-----AIGSK-----VGLERF  
LRH-----  
>KQL09067

-----  
-----MAAAMADPSC  
PPFPLLAEEGHHEQH----EHQEVPHGG-----ELEVPTVDLQAP  
G--EA-----LAAACRRLGVFRLAN--HGV----  
PGD--LSARLFALARDLLGRAPFLDKQA-----QPG-----YFWGTP-ALS  
SLRV-RDVNWVEG-----FHV-ALAGQQ-----QHRPVTAAAAP-----  
--PPSDDLAAAL-R-----DLA-REYGAHMAR  
VARALFDALAA-AL---G---L---G---SE-----QSSAYL-----AERDGFLRV  
YRYPPC-PEP-----GH--LGMEAHTDSSVLSVIN-  
QD---L-VGGLQVL--HD-----G-----AWRDVAPAGRGDAGT--LLVNLGDM  
ARAI SGDAWR-----SVRHRV-AA-----S--RA-AERLSLCYFAFPRDDAVITC-----  
-----AGG-----SR---YRPFTY-----AEFREQVQADIK-----  
-----ATGSK-----VGLERF  
LRH-----  
>Zm00001d035994\_P001

-----  
-----MASGSDSRTAAD  
PSYPPFPLLEQDDEG----GGHVHEQEQEARRG-----GALELPTVDLEAP  
G--EA-----LAAACRELGVFRLAN--HGV----  
PAA--LSARLFALARAALAGAPFRDKRA-----QPG-----YFWGTP-ALS  
LRV--RDVNWVEG-----FHV-----ALGEAQQQQQHAP-----  
--VPPPPLGDLL-----GLARAEGAHMTR  
VARTLFDALAP-AL---G---L---G---AA-----QAASYL-----AERDGFLRV  
YRYPRC-PEP-----GR--LGMEAHTDSSVLSVIN-  
QE---EGAGGLQVL--HG-----G-----AWRDVAP----AAGASTLLVNLGDM  
ARAI SGDAYR-----SVRHRV-AA-----S--QA-AERLSLCYFAFPRDDAVIT-----  
-----CGA-----GR---YRPFTY-----AEFREQVQADIK-----

-----ATGSK-----VGLERF  
LLHH-----  
>OQU85872  
-----  
-----MALGSESQAATTAD  
PSCPPFP---LLEDD-----GGHIHEQEVEP-----SGA---EELPTVDLDAP  
G--EA-----LAAACRGLGVFRLAN--HGV----  
PAS--LSARLFATARAALAGAPFHDKRA-----QPG-----YFWGTP-ALS  
LRV--RDVNWVEG-----FHV-----ALGGHQQP-----  
--APGPPLGDL-----DLA-AEYGAHMAR  
VARALFDALAA-PL---G---L---G---AD-----QAATYL-----AERDGLRV  
YRYPRC-PEP-----GH--LGMEAHTDSSVLSVIN-  
QD---A-VGGLQVF--HD-----G-----AWRDVAP-GAGETGT--LLVNLGDM  
ARASGDAYC-----SVRHRV-AA-----S--QA-AERLSLCYFAFPQDDAVIS-----  
-----CAG-----GR---YRPFTY-----AEFREQVQADIK-----  
-----ATGSKKPVGAPLAGPHGTVTVSIAGANAF  
NMVLSWTV-----  
>KQK21235

-----MEDHEYEQDESNPPL  
ATYKHLLDGEHRRLP---LGVVAGDEE-----DDQCDLPVIDLAPL  
L--LDLESDQQTRNNGGSSSA-----ACRAAMVRAASEWGFFQVTN--HGV----  
PQP--LDELHGQQLRAF-RRPFHRKLAPGDGDEDQLLL--SPE----AYRWGNP-TAT  
-CL--HQLSWSEA-----YHV-----PITTP-----  
--SPETKTTTAT-R-----RVI-HEVSAAMSK  
LARRILSVLAA-EH---G-----PP-----PET-----ETTCFLRL  
NRYPPQA-PGSGGGHGH-----GV--LGLCGHTDSDFLTLR-  
QD---DHVGLQLL--LD-----DK---DGRRWRTVRP----NPGA--LTVNVGDL  
LQAWTNDVYA-----SVEHRV-VA-----R--PD-RERFSVAFFLCPSYDTLIRPPL--  
-----PGKTTT---S-QV---YRNFTF-----GEYRSQVREDVR-----  
-----LTGRK-----VGLPRF  
RRHVSPSPASLTHQLS-----  
>LOC\_Os07g01340.1

-----MEEHDYDSNSNPPLM  
STYKHLFVEQHRLDM---DMGAIDVDE-----CELPVIDLAGL  
M--EAEQ-----VCRADMVRAASEWGFFQVTN--HGV----  
PQA--LLRELHDAQVAVF-RRPFQEKVTERLLGF-----SPE----SYRWGTP-TAK  
-CL--EQLSWSEA-----YHI-----PMTTPRPSTSIRAR-----  
-----AVI-EEVSRAMYE  
LAQKLAEILMR-GL---PG-----AG-----EGETMV---TTRETCFLRL  
NRYPPC-AMA-----M-GG--FGLCPHTDSDLLTIVHQ  
QQ---DTVGLQLL--KG-----G-----RWVAVKP----SPST--LIVNVGDL  
LQAWSNDVYK-----SVEHRV-MA-----N--AT-LERFSMAFFLCPSYHTLIIPSS--

```

-SHVH-----DDD-----AH---YRSFTF-----GEYRKQIMEDVR-----
-----STGRK-----IGLHRF
RTR-----
>KQK85900
-----
-----MDESNPPLM
TTYKHLL---DTHPHRRLDAVDDHNSGC-----VLPVIDLGSL
QHAPE-----QCRAAIVRAASEWGFFQVTN--HGV----
PQP--LLDELHDAQVAVF-RRPFERKLREPLDF-----SPE----SYRWGTP-TAT
-CL--EQLSWSEA-----YHI-----PMITPAAAA-----
--AAGDDDRTRL-----VI-EEVSTAMSK
LALQLAGILVA-DL---R-----GD-----EEKDMV--ARCTRNTCFLRL
NRYPAC-GAA-----T-GA--FGLCPHTDSDFLTILH-
QD---A-VGGLQLL--KA-----G-----RWVAVKP---NPGA--LIVNVGDL
LQAWSNDRYR-----SVEHRV-MA-----S--AA-SERFSVAFFLCPAYDTLIRPRSTT
SCSGG-----GAS----P-PR---YRSFTF-----GEYRNQIKEDVR-----
-----LTGRK-----IGLQRF
RLQQQQLQGGGPL-----
>Zm00001d018617_P001
-----
-----MAMEEDDDYEPLM
ATYKHLL---DSHPH-----RQLGAGAAQDDE-----DCFLLPVIDLSSL
L-----PPVHHRKQSSSAAAAEQCRASIVRAASEWGFFQVTN--HGV----
PQV--LLDELHQAQAGVF-RRPFQLKAHQPLLD-----SPE----SYRWGTP-TAT
-CL--EQLSWSEA-----YHI-----PTTTTTTGNDKTR-----
-----LVV-EEVSTAMSK
LAQRLAGILVA-EL---G-----EDS--AA-----AVVSRC-----TRSTCFLRL
NRYPPC-AAA-----A-SGVVYGLCPHSDSDFLTILH-
QD---G-VGGLQLV--KD-----G-----QWVAVKP---SPGA--LIVNVGDL
LQAWSNDRYR-----SVEHRV-MA-----S--AT-RERFSAAFFLCPSTYDTLIRPRC--
----G-----AGG----PPPR---YESFTF-----GEYRNQIREDVR-----
-----LTGRK-----LGLQRF
RKA-----
>EER95722
-----
-----MEDYDYEPLM
ATYRHLL---DSHPH-----RLDVVDHRSGAD-----DDEEGFLPVIDLSSL
L--EQS-----SSGAEA-----AAEQCRAS-IVRAASEWGFFQVTN--HGV----
PQA--LLDELHQAQVAVF-RRPFHLKASQP-----LLDFSPE----SYRWGTP-TAT
-CL--DQLSWSEA-----YHI-----PTT-----
--NTTAAADDKT-R-----LVV-EEVSTAMSK
LAQRLAGILVA-DL-LL-GDSSI----GD---GEDDDTAAAVVSRC-----TRSTCFLRL
NRYPPC-PAP-----S-GA--YGLCPHTDSDFLTILH-
QD---G-VGGLQLV--KA-----G-----RWVAVKP---NPGA--LIVNVGDL

```

LQAWSNDRYR-----SVEHRV-MA-----SDARERFSVAFFLCPSYDTLVRPRC--  
-----G-----AGG----P-PR---YESFTF-----GEYRNQIREDVR-----  
-----LTGRK-----LGLQRF  
RKPE-----  
>HORVU2Hr1G090030.9

-----XXXXXXXXXXXXXXXXXXXXX  
XXXXXXXXXXXXXXXXX-----XXXXXXXXX  
X-----XXXXXXXXXXXXXXXXXXXXX---XXX---  
XXX--XXXXXXXXXQARLF-RLPFDTKKAGL-----LNG----SYRWGNP-TAT  
-SL--RHLSWSEA-----FHV-----PLATISRED-----  
--CDYGKLSSL--R-----YVLTSXXXXXXXXX  
XXXXXXXXXXXX-XX---X---X-----XX-----XXXXX-----XXXXXXLRL  
NRYPC-PFA-----P-DT--FGLVPHTDSDFTILC-  
QD---Q-VGGLQLM--KD-----A-----RWVAVKP----HPDA--LIVNVGDL  
FQAWSNNRYK-----SVEHKV-VA-----N--YK-AERFSVAYFLCPSYDSPVGTCS--  
-----EPS----P-----YRPFTF-----GEYRRKVQDDVK-----  
-----RTGKK-----IGLPNF  
LK-----  
>LOC\_Os02g41954.1

-----MPAIADCAADPPLA  
DSYYTLRLGGDDDD-----DACTKVTTTPQP-----VSECELPIDVGL  
T--APTGAA-----AAAVGQQHQAEERAACAAA-IAAAAIEWGFFQVFN--HGV----  
AQE--LLEAMRREQARLF-RLPFEAKSSA-----GLLND--SYRWGTP-TAT  
-SL--RQLSWSEA-----FHL-----PLAGISGKS-----  
--CNYGDLTSL--R-----DVT-REVADAMSR  
LARALARVLAE-SL-----LGHAAGE-----RFPEGC-----DDATCFRL  
NRYPPC-PFP-----PDDA--FGLVPHTDSDFTVLC-  
QD---H-VGGLQLM--KG-----S-----RWVAVKP----IPGA--LIVNIGDL  
FQAWSNNRYK-----SVEHRV-MT-----N--AT-TERYSVAYFLCPSYDSPIGTCR--  
-----EPS----P-----YKATF-----GEYRRRVQEDVK-----  
-----KTGKK-----TGLSNF  
LV-----  
>KQK00433

-----MPAFAESAAEPPLA  
DSYHALLRRAGADGR----NKDAHCTPTVHADH-----VLPAPDMAVSECELPIDVGL  
T--TGGGS-----AEERAA-----CAAA-IAGAAEDWGFFQVFN--HGV----  
KQE--LLEAMRREQTRLF-RLPFEAKATA-----GLLNH--SYRWGTP-TAT  
-SP--AQLSWSEA-----FHV-----PLAAVSGDPP-----  
--CNYGQLTTL--R-----DVT-QEVATAMSK  
LANTLARVLAE-RL----G-----HA---GE-----RFPEGC-----DERTCFRL  
NRYPPC-PLS-----P-DA--FGLVPHTDSDFTVLC-

QD---Q-VGGLQLM--KG-----S-----RWLAVKP----IPNA--LIVNIGDL  
FQAWSNNRYR-----SVEHKV-VT-----N--AT-TERYSVAYFLCPSYDSPIGACE--  
-----EPS----P-----YRTFTF-----GEYRRRVQEDVK-----  
-----KTGKK-----VGLPGF  
LL-----  
>KQL30590

-----MPAFAGSAAEPPLA  
DSYHALL---RRHGG-----GDNDDGAHTAAV-----PVAECELPMIDVGCL  
T--RD-----GGGSEA-----ERAACAAA-IARAAEEWGFFQVRN--HGV----  
APG--LLDAMRREQARLF-RLPFEAKSTA-----GLLND--SYRWGTP-TAT  
-SP--RQLSWSEA-----FHV-----PLAGVSGDR-----  
--CNFGDLTA--LR-----DVT-REVAGAMSK  
LAGTLARVLAE-AL-----L-----AGRRPAGERFPEGC-----DETT CFLRL  
NRYPPC-PVS-----P-DA--FGLVPHTDSDFLTVLC-  
QD---H-VGGLQLM--KG-----A-----RWVAVKP----IPGA--LIVNIGDL  
FQAWSNNRYK-----SVEHKV-VT-----N--AT-TERYSVAYFLCPSYDSPIGTCE--  
-----EPS----P-----YRTFTF-----GEYRSKVQEDVK-----  
-----RTGKK-----IGLPNF  
LV-----  
>Zm00001d017294\_P001

-----MPAFAGGAAEPPLA  
DSYYALLRRGNDDEGAYTTSTAPWDDVS-----LPVAECELPMIDVGCL  
TTADDGSSPEAEAERA-----ACAAAIARAAEEWGFFQVRN--HGV----  
PQE--LLEEMRREQARLF-RLPFETKATAGL-----LND----SYRWGTP-TAT  
-SP--RQLSWSEA-----FHV-----PLAGVSGSGTT-----  
--CDFGDLTTLR-----DVT-REVAGAMSK  
LAGTLARVLAE-AL-----L---GRRPAGE-----RFPEGC-----DETT CFLRL  
NRY PAC-PIS-----P-GA--LGLVPHTDSDFLTVLC-  
QD---QQVGGLQLM---K-----G-----DSWVAVKP----IPGT--LVVNIGDL  
FQAWSNNRYK-----SVEHKV-MT-----N--AR-TERYSVAYFLCPSYDSPIGT----  
-----CEE----P-SL---YRTFTF-----GEYRRKVQEDVK-----  
-----RTGKK-----VGLPNF  
LAQT-----  
>KXG30679

-----MPAFAGSAAEPPLA  
DSYYALLRRRGGGGN-----NDDEEASGGAYYYDTTSSTVPSSDDDVAECELPMIDVGCL  
T-----TLTRSEHGSSSEAERA ACTAAIARAAEEWGFFQVRN--HGV----  
SQE--LLDEMRREQARLF-RLPFEAKATAGL-----LNH----SYRWGTP-TAT  
-SP--QQLSWSEA-----FHV-----PLAGVSGSAAAGT-----  
--CDFGDLTTL--R-----DVT-REVAGAMSK  
LAGTLARVLAE-EARPRPC---LPAGGGGGGGGGE-----RFPEGC-----DETT CFLRL

NRYPPC-PIA-----A-DA--FGLVPHTDSDFTVLC-  
QD---QQVGGQLQM--KG-----G-----RWVAVKP----IPGA--LIVNIGDL  
FQAWSNNRYK-----SVEHKV-MT-----N--AK-TERYSVAYFLCPSYDSPIGT-----  
-----CEE---P-SL---YRTFTF-----GEYRRKVQEDVK-----  
-----RTGKK-----VGLPNF  
LV-----

>HORVU4Hr1G072540.2

-----YSSFLFRFRAPPIL  
ASRD-----ARESK-----  
-----ACADAMARAASEWGFFQVVN--HGV---  
GLE--LLEEMRREQAKLF-RLPFGTKDKAGL-----LNG---SYRWGNP-TAT  
-SL--GQLSWSES-----FHV-----PLPSVSPEG-----  
--CDYGKLSTL--R-----GVM-QEVADAMSR  
VADTVAGTLAE-NL----G-----HEAGGGGGES-----AFPGGC-----DGTTCFLRL  
NRYPAC-PFA-----A-DS--LGMVPHTDSDFTILF-  
QD---Q-VGGLQLI--KD-----A-----RWVAVKP----HAEA--LIVNVGDL  
FQAWSNNKYK-----SVEHKV-VA-----N--SS-AERFSVAYFLCPSWDSPVGT-----  
-----CGE---P-SP---YKPFTF-----GEYRRSVQDDVE-----  
-----RTGKK-----IGLPNF  
LKRSTVDVTEP-----

>KQK98136

-----MPAFTESRAAAEPPLA  
ESYDLLRRGGGGIA-----PPGEGRV-----AVQERELPLIDLGCL  
M-----TTSGQQGSRSAAREARAACAYAMARAASEWGFFQVTG--HGV---  
GRA--LLERLRAEQARLF-RLPFETKARAGL-----LNG---SYRWGAP-TAT  
-SL--RHLSWSEA-----FHV-----PLASISGS-----  
--CDFGELGSL--R-----GVM-QEVADAMSR  
VAKTVAVALAG-SLLQ--G-----HHAAAAA-----AFPAGC-----DETTCLRL  
NRYPAC-PFA-----P-DT--FGLVPHTDSDFTVLC-  
QD---Q-VGGLQLM--KD-----A-----RWVAVKP----HPDA--LIVNIGDL  
FQAWSNNRYK-----SVEHKV-VA-----N--AK-AERFSAAYFLCPSYDSPVGT-----  
-----CGE---P-SP---YRSFTF-----GEYRRMVQEDVK-----  
-----RTGRK-----IGLPSF

LKQQQPQ-----

>Zm00001d002999\_P001

-----MRYVAATPTMPSLVAESAAEPPLV  
DSYLELLRRGGGGGG-----IAATEGCV-----QERELPLIDLTCL  
Q--GSAG-----EAARTT-----CADA-MARAASEWGFFQVTG--HGV---  
SRA--LLERLRAEQARLF-RLPFETKAKAGL-----LNG---SYRWGAP-TAT  
-SL--RHLSWSEA-----FHV-----PLASIS-----GTA-----  
--CDFGELSS--LR-----DVV-QEVADAMSR

VAKTVAVALAGSLL---G---H---DE---AA-----AFPAGC-----GETTCYLRL  
NRYPAC-PFA-----A-NT--FGLVPHTDSDFTVLS-  
QD---Q-VGGLQLM--TD-----A-----GWVAVKP----RPDA--LIVNIGDL  
FQAWSNNLYK-----SVEHKV-VA-----N--AA-AERFSAAYFLCPSYDSLVTG----  
-----CGE----P-SP---YRDFTF-----GEYRRKVQEDVK-----  
-----RTGRK-----IGLPNF  
LKHRPPPPQSRPA-----  
>KXG26736

-----MRYVAATPTMPALTTTAAESAAEPPLA  
DSYLDLLRRGGIATP-----PRTEGRCCVQER-----ELPLIDLSC  
Q--QRSGGGG-----GSARAA-----CADA-MARAASEWGFFQVTG--HGV----  
SRA--LLERLRAEQARLF-RLPFETKAKAGL-----LNG----SYRWGAP-TAA  
TSL--RHLSWSEA-----FHV-----PLASISGAA-----  
--CDFGDLSSL--R-----GVM-QEVADAMSR  
VAKTVAVALAG-SLLQGGG---H---DEHEAAA-----AFPAGC-----DETTCYLRL  
NRYPAC-PFA-----A-DT--FGLVPHTDSDFTVLC-  
QD---H-VGGLQLL--KD-----G-----RWVAVKP----RPDA--LIVNIGDL  
FQAWSNNRYK-----SVEHKV-VA-----N--AT-AERFSAAYFLCPSYDSPVGT----  
-----CGE----P-SP---YRDFTF-----GEYRRKVQEDVK-----  
-----RTGRK-----IGLPNF  
LKQQSRQ-----  
>LOC\_Os04g44150.1

-----MPAFADIAIDPPLA  
DSYRALALLRRDRDG---GIAPPAVQMVGSGG-----AVLERDLPMVDLERL  
T--RG-----GAGERK-----ACAGAMARAASEWGFFQLTN--HGV----  
GRE--LMEEMRREQARLF-RLPFETKEKAGL-----LNG----SYRWGNP-TAT  
-SL--RHLSWSEA-----FHV-----PLASISGAD-----  
--CDFGDLTSL--R-----GVM-QEVAEAMSR  
VANTVAAALAE-ELTGRGG-----GGASAAP-----WFPAGC-----DETTCLRL  
NRYPAC-PFA-----A-DT--FGLVPHTDSDFTVLC-  
QD---Q-VGGLHLM--KD-----S-----RWVAVRP----RPDA--LVVNIGDL  
FQAWSNNRYK-----SVEHKV-VA-----N--AK-TDRLSVAYFLCPSYDSLVTG----  
-----CGE----P-SP---YRAFTF-----GEYRKKVQEDVR-----  
-----TTGKK-----IGLPNF  
FKHSSVQ-----  
>KQJ83649

-----MPALFADGATSDPPLA  
DSYRALLRSGGIAHP-----PEESLSP-----VLERDLPMIDIECL  
I--T-----TGEGEG-GASSMRKKKACADA-MARAASEWGFFQVTN--HGV----  
GKE--LLEEMRKEQARLF-RLPFETKRKAGL-----LNG----SYRWGNP-TAT  
-SL--RQLSWSEA-----FHV-----PLASIS-----GRD-----



--CDYGLSS--LR-----GVM-QEVADAMSR  
VADAVAGALAE-KLGQEAG-----SA-----LFPAGC-----DGTTCFLRL  
NRYAC-PFA-----P-DT--FGLVPHTDSDFLTILC-  
QD---Q-VGGLQLM--KD-----S-----RWVAVKP---HPDA--LIVNIGDL  
FQAWSNNRYK-----SVEHKV-VA-----N--AK-AERFSVAYFLCPSYDAPVGT----  
-----CGE----P-SP---YRSFTF-----GEYRRKVQDDVK-----  
-----RTGKK-----IGLPNF  
LKHPPIVDGLK-----  
>HORVU2Hr1G118350.1

-----MPSQLNKDPHNRYFDLGAAREV  
PDTHAWD---GQHEL-----PVVDGGVGAGDD-----AVPVVDMRDP  
R-----AAEA-VARASEQWGAFLLEG--HGV----  
PTE--LLARVEAGIAGMF-ALPTPEKMRAAR-----HDG-D--LYGYGPP-LIA  
SYV--SKNMWSEG-----YTL-----TPANLHAEFR-----  
--KIWPDAGQHY-RHFS-----GVM-EEFLKEMRS  
LANRLMELFLV-AL---G---L--TAEQIAGVE-----AEHNLT-----ESMTETMHL  
NWYPKC-PDP-----T-RA--LGLKGHTDSGFFTFVM-  
QS--Q-VPGLHLF--RH-----G--PPADRWVEVPA---VPGA--LIVNIGDL  
FQILTNGRFR-----SVYHRV-VV-----N--RE-RERISVAYFLIPPADVKVAPLK--  
-EVVG-----GGK-----PV---YRALTWSESIVRKEAFANHGADLE-----  
-----FGKGR-----TALDML  
SISSDEDDGAEHHRD-----  
>HORVU3Hr1G022840.8

-----MPTPSHLSKDPHYDFRAARRV  
PETHAWP---GLHDH-----PVVDGGGAGGGP-----D-----AVPVVDMRDP  
C-----AAEA-VALAAQDWGAFLQ--HGV----  
PLE--LLARVEAAIAGMF-ALPASEKMRAVR-----RPG-D--SCGYGSP-PIS  
SFF--SKCMWSEG-----YTF-----SPANLRSDLR-----  
--KLWPKAGHDYRHFC-----AVM-EEFHREMRV  
LADKLELFLV-AL---G---L--TGEQVAAVE-----SEHKIA-----ETMTATMHL  
NWYPKC-PDP-----K-RA--LGLIAHTDSGFFTFVL-  
QS--L-VPGLQLF--RH-----G-----PDRWVTVPA---VPGA--MVVNVDGL  
FHILTNGRFH-----SVYHRA-VV-----N--RD-SDRISLGYFLGPPAHVKVAPLR--  
-EAL-----AGT----P-AA---YRAVTW---PEYMGVRKK-AFTTG-----  
-----ASALK-----MVAI  
STDDAADIDSGAGCVQPSRER-----  
>LOC\_Os01g08220.1

-----MPTPSHLKNPLCFDFRAARRV  
PETHAWP---GLDDH-----PVVDGGGGGGED-----AVPVVDVGAG  
D-----AAAR-VARAAEQWGAFLLVG--HGV----  
PAA--LLSRVEERVARVF-SLPASEKMRAVR-----GPG-E--PCGYGSP-PIS

SFF--SKLMWSEG-----YTF-----SPSSLRSELR-----  
--RLWPKSGDDY-----LLFCDVM-EEFHKEMRR  
LADELLRLFLR-AL----G---L--TGEEVAGVE-----AERRIG-----ERMTATVHL  
NWYPRC-PEP-----R-RA--LGLIAHTDSGFFTFVL-  
QS---L-VPGLQLF--RR-----G-----PDRWVAVPA----VAGA--FVVNVGDL  
FHILTNGRFH-----SVYHRA-VV-----N--RD-RDRVSLGYFLGPPPD AEVAPLP--  
-EAVP-----AGR----S-PA---YRAVTW----PEYMAVRKK-AFATG-----  
-----GSA-----LKMV  
STDAAAAA DEHDDVAAAADVHA-----  
>KQL04660

-----MPTPSHLKNPLYDFRAARRV  
PESHAWP---GLDDH-----PVVDGGGAPGSP-----DAVPVVDLREP  
G--A-----AAVARVARAAEQWGAFLLTG--HGV----  
PAE--LLARVEDRVACMF-ALPAADKMRAVR-----GPG-D--ACGYGSP-PIS  
SFF--SKCMWSEG-----YTF-----SPASLRDLR-----  
--KLWPKAGDDY-DSF-----CDVM-EEFHKEMRA  
LADRLLELFLR-AL----G---L--TGEQVGAVE-----AERRIG-----ETMTATMHL  
NWYPRC-PDP-----R-RA--LGLIAHTDSGFFTFVL-  
QS---L-VPGLQLF--RH-----G-----PNRWVAVPA----VPGA--FVVNVGDL  
FHILTNGRFH-----SVYHRA-VV-----N--RD-LDRISLGYFLGPPPHAKVAPLR--  
-EVVP-----PGR----A-PA---YRAVTW----PEYMGVRKK-AFTTG-----  
-----ASALK-----MVAA  
AAAATESDDTDAAAA AVHQPPVVSS-----  
>Zm00001d039634\_P001

-----MPTPSHLNKNPRYLDFAARRV  
PESHAWP---GLHDH-----PVVDGGA-----PGPD AVPVVDLGAA  
D--PAP-----APAAAVARAAEQWGAFLLTG--HGV----  
PAD--LLARVEDRIATMF-ALPADDKMRAVR-----GPG-D--ACGYGSP-PIS  
SFF--SKCMWSEG-----YTF-----SPASLRADLR-----  
--KLWPKAGDDY-TSF-----CDVM-EEFHKHMRA  
LADKLLELFLM-AL----G---L--TDEQASAVE-----AERRIA-----ETMTATMHL  
NWYPRC-PDP-----R-RA--LGLIAHTDSGFFTFVM-  
QS---L-VPGLQLF--RH-----A-----PDRWVAVPA----VPGA--FVVNVGDL  
FHILTNGRFH-----SVYHRA-VV-----N--RD-LDRISLGYFLGPPPHAKVAPLR--  
-EAVP-----PGR----A-PA---YRAVTW----PEYMGVRKK-AFTTG-----  
-----ASALK-----MVAL  
AAAADLDDDGDAAVVHQQQQLVSS-----  
>EES00202

-----MPTPSHLANPRYDFRAARRV  
PETHAWP---GLHDH-----PVVDGGA-----PGPD AVPVVDLAGA  
A--DEPRA-----AVVAQVARAAEQWGAFLLTG--HGV----

PAE--LLARVEDRIATMF-ALPADDKMRAVR-----GPG-D--ACGYGSP-PIS  
SFF--SKCMWSEG-----YTF-----SPANLRADLR-----  
--KLWPKAGDDYTSFC-----DVM-EEFHKHMRA  
LADKLELFLM-AL---G---L--TDEQVGGVE-----AERRIA-----ETMTATMHL  
NWYPRC-PDP-----R-RA--LGLIAHTDSGFFTFVL-  
QS---L-VPGLQLF--RH-----A-----PDRWVAVPA---VPGA--FVVNVGDL  
FHILTNGRFH-----SVYHRA-VV-----N--RD-LDRISLGYFLGPPPHAKVAPLR--  
-EAVP-----PGR----T-PA---YRAVTW----PEYMGVRKK-AFTTG-----  
-----ASALK-----MVALAAA  
AAAADLDDDAGAGAAEPVHQQLLVSS-----  
>KQJ89115

-----MPTATHLDFQAARGV  
PETHEWP---VLHDH-----PVVDGGAGAGED-----EVPVVDLRDA  
D--PAK-----VAAA-MARAAEQWGAFLLG--HGV----  
PAD--LVARVEERIEAMF-ALPASEKTRAVR-----GRG-E--SCGYGSP-PIS  
GFF--DKSMWSEG-----YTF-----APANVRDL--  
--KLWPDAGPHY-----LLFCEVM-EEFHKGMA  
LAHKLLGLFLS-AL---G---L--TAAD---CA-----AAAKIA-----DTMAASML  
NWYPKC-PDP-----K-RA--VGLIAHTDSGYFTFVL-  
QS---M-VPGLQLF--RR-----EPDRWVAVPA---MPGA--FVINVGDL  
FNIVTNGRFH-----NVFHRA-VV-----S--RE-SHRVSLGYFLGPPAQAVAPLD--  
-EALT-----LDR----PRPA---YRPVWV----REYMGLREKALF-----  
-----VGESA-----LKMI  
AVAKDDAPQTPKLHETS-----  
>KQK02988

-----MPTASHLTSPRYDFRAARGV  
PESHAWP---GLHDH-----PVVDGGAGAGAG-----EDDADRVVVDMRAD  
P--S-----AAAAVARAAETWGAFLEG--HGV----  
PES--LLARVEERVAGMF-ALPAPEKMRAVR-----GRG-E--SCGYGSP-PIS  
SFF--AKSMWSEG-----YTF-----SPAHLRRDLR-----  
--KLWPKAGPDY-LLF-----CEVM-EEFHREMRL  
LADKLLGLFLR-AL---G---L--TADEALAVE-----ATHRIA-----ETMTATTHL  
NWYPRC-PDP-----K-RA--LGLIPHTDSGYFTFVL-  
QS---Q-VPGLQLF--RR-----G---PD--RWVAVPA---VPGA--FVVNVGDL  
FSILTNGRFH-----SVFHRA-VV-----N--KE-SHRVSLGYFLGPPAQTRVGPLE--  
-EALT-----PAR----PKPM---YRPVTW----PEYMTVRKK-AFATG-----  
-----DSA-----LQMV  
AVDQDDDDDAQTKLANRKIKVSGEAY-----  
>LOC\_Os05g08540.1

-----MQIMTSSSTSPTSPTSPLAAAADNGVAAAYFNFRGAERV  
PESHVWK---GMHEK---DTAPVAAADADGGD-----AVPVVDMSSG

D--DA-----AVAA-VARAAEEWGGFLLVG--HGV----  
TAE--ALARVEAQARLF-ALPADDKARGAR-----RPGGG--NTGYGVPPYLL  
RYP---KQMWAEG-----YTF-----PPPAIRDEF-----  
--RVWPDAGDDYHRC-----SAM-EEYDSSMRA  
LGERLLAMFFK-AL----G---L--AGNDAPGGE-----TERKIR-----ETLTSTIHL  
NMFPRC-PDP-----D-RV--VGLAHTDSGFFFIL-  
QS---P-VPGLQLLRHRP-----D-----RWVTVPG----TPGA--LIVVVGDL  
FHVLTNGRFH-----SVFHRA-VV-----N--RE-RDRISMPYFLGPPADMKVTPLV--  
-----AAGS---P-ESKAVYQAVTW---PEYMAVRDK-LFGTN-----  
-----ISA-----LSMI  
RVAKEEDKES-----

>KQL13797

-----MLSPMTTSPAAAAATPCFELRSAERV  
PETHAWP---GIDDH-----PTVKAAA-----GGDAVPVVDLGGD  
P-----DVARAAAGRAAEEWGAFLLVG--HGV----  
AAG--VAARVEEQVARLF-ALPAAEKARAGR-----RPG-E--FNGYGRAPRLN  
-F---SNHMWSEG-----YTF-----PAAAVRAEFR-----  
--RVWPDAGDDYLRFC-----DVM-EEHHAEMRA  
LGVRLDMLFG-AL----G---L--TDAQIAAGE-----TEREIR-----ETLTATTHL  
NMYPRC-PQP-----E-RA--IGMAAHTDSGFITIL-  
QS---P-VPGLQLL--RR-----QPDRWVTVPA----PPGA--LVVVLGDL  
FQVLTNGRFR-----SALHRA-VV-----N--RE-RDRISVPYFLGPPADMKVAPLA--  
-AAMP-----PGT---K-AA--FRGVTW---REYLEIREKQAISVD-----  
-----ASV-----MKML  
QVAEEEEEGGVPPNN-----

>Zm00001d037627\_P001

-----MQSSSSASTPAAASGLVFDLGSAGV  
PETHAWP---GVNEY-----PSVESAG-----RDVVPVDMGVA  
C--PD-----ATRA-LARAADEWGVFLLVG--HGV----  
PRE--VAARAEQVARLF-VLPAPDKARAGR-----RPG-EPTATGYGRP-PLA  
LRF--SKLMWSEG-----YTF-----RAATVREEFR-----  
--RVWPDGGDDYLRFC-----DVM-EEYDREMRA  
LGGRLDLFFM-AL----GLTDVQFATGE-----TERRIR-----ETWTATMHP  
ILYPRC-PEP-----E-RA--IGLTAHTDSGFITIL-  
QS---P-VPGLQLL--RR-----G-----PDRWVTVPA----PPGA--LIVMLGDL  
FQVLTNGRFR-----SPIHRA-VV-----S--RE-RERISVPYFLCPPEDMTVAPLA--  
-SALL-----PGR---K-AV--FRAVTW---PEYMEVKHK-VFGTD-----  
-----APA-----LEML

QLQVDEEEQGERAATT-----

>KXG21453

-----MMPSSSSASTPAAASGGLFELGSAASV

PETHAWP---GVNEH-----PSVESAG-----RDAVPVMDMGMG  
G-----PDDADA-----AARA-VARAAEEWGAFLLVG--HGV----  
PRG--VAARAEQVARLF-ALPAPDKARAARRR-----RAA-AAAAAGYGMP-PLA  
LRF--SKLMWSEA-----YTF-----PAAAVRDEFR-----  
--RVWPDAGDDYLRFWYVRTPVWYVTRATLPHVDLHLHVHACMRAPSDVM-EEYDREMRA  
LGGRLLDLFFM-AL----G---GGLTDDDQIAGGETTT--TERKIR-----DNLTAMMHP  
ILYPKC-PEP-----E-RA--MGLAPHTDSGFITLIT-  
QS---AGVPGLQLL--RR-----G---PD-RWVTVPA----PPGA--FVVVLGDL  
FQVLTNGRYR-----SALHRA-VV-----N--RE-RDRISVPYFLGPPDGMKVAPLA--  
-SALL-----PGR----RKA--FRAVTW----PEYMELKHK-VLGTD-----  
-----TSA-----LEML  
QLDEEEM-----  
>KQK10911

-----MVLQPAQQ  
QQPSSQLPYPPHCSERSPAAMDTAPPLVLSPSAPSITDTSTAKAKQSAAPVFDLRREP  
PAPFVWP---HAEVR-----PTTAEL-----GMPVVDVGVL  
R--KSRN-----GGGDAA-----ALRRAVAQ-VAAAGATHGFFQVSG--HGV----  
DAA--LARAALDGASDFF-RMPLADKQRARR-----VQG-T--VSGY TSA-HAD  
RFA--TKLPWKET-----LSF-GFHGQD-----CAEAKPVVD-----  
--YFTSTLGQDF-EPM-----GRVY-QEYCEKMKE  
LSLTIMELLEL-SL----G---V---E---RG-----YYREFF-----ADSSSIMRC  
NYYPPC-PEP-----E-RT--LGTGPHCDPTALTILL-  
QD---D-VGGLEVL--VD-----G-----DWRPVRP----VPGA--MVINIGDT  
FMALSNGRYK-----SCLHRA-VV-----N--RQ-QERRSLAFFLCPRQDRVVRPPL--  
-AVVS-----SSA----P-RQ---YPDFTW----ADLMRFTQR-HYRAD-----  
-----TRT-----LDAF  
TQWLAPSSSSSSSPAPSAAPPPPVASTAQEAA-----  
>HORVU3Hr1G090980.3

-----MVLQTAQQEPSLTR  
PPRCSVASAGSPAAMDTSPATPLLLQPPAPSIDPSAAKAAVSKGGAATAVYDLRREP  
PAPFVWP---HAEVR-----PTTAQEL-----AVPVVDVGVL  
R--NGD-----AAGIRR-----AVAQ-VASACATHGFFQVSG--HGV----  
DNA--LARAALDGASGFF-RLPLAEKQRARR-----IPG-T--VSGY TSA-HAD  
RFA--SKLPWKET-----LSF-GFHDRA-----GAAAPVVD-----  
--YFTSTLGPDY-EPM-----GRVY-QEYCGKMKE  
LSLRIMELLEL-SL----G---V---EK--RG-----YYRDFE-----ADSSSIMRC  
NYYPPC-PEP-----E-RT--LGTGPHCDPTALTILL-  
QD---D-VGGLEVL--VD-----G-----DWRPVRP----VPGA--MVINIGDT  
FMALSNGRYK-----SCLHRA-VV-----N--RR-QERRSLAFFLCPRDRVVRPPP--  
-SLRS-----P-RQ---YPDFTW----ADLMRFTQR-HYRAD-----  
-----TRT-----LDAF  
TQWFSSAQEAA-----  
>LOC\_Os01g66100.1

-----MVAEHPTPPQPHQPPMDSTAGSGIAAPAAAAVCDLRMEPKI  
PEPFVWP---NGDAR-----PASAAEL-----DMPVVDVGVL  
R--DGD-----AEGLRR-----AAAQ-VAAACATHGFFQVSE--HGV----  
DAA--LARAALDGASDFF-RLPLAEKRRARR-----VPG-T--VSGY TSA-HAD  
RFA--SKLPWKET-----LSF-GFHDRA-----AAPVVAD-----  
--YFSSTLGPDF-APM-----GRVY-QKYCEEMKE  
LSLTIMELLEL-SL----G---V----E----RG-----YYREFF-----ADSSSIMRC  
NYYPPC-PEP-----E-RT--LGTGPHCDPTALTILL-  
QD---D-VGGLEVL--VD-----G-----EWRPVSP----VPGA--MVINIGDT  
FMALSNGRYK-----SCLHRA-VV-----N--QR-RERRSLAFFLCPREDRVVRPPP--  
-----SAAT----P-QH---YPDFTW----ADLMRFTQR-HYRAD-----  
-----TRT-----LDAF  
TRWLAPPAADAAATAQVEAAS-----  
>KQL08016

-----MVSQAQQEPALPHS  
SSTAKRAAASLMDARPAQPLLLRAPTPSIDLPASKPDRAAAAAGKAAAASVFDLRREPKI  
PAPFVWP---HDDAR-----PASAAEL-----DVPLVDVGVL  
R--NGD-----RAGLRR-----AAAQ-VAAACATHGFFQVCG--HGV----  
GAD--LARAALDGASDFF-RLPLAEKQRARR-----VPG-T--VSGY TSA-HAD  
RFA--SKLPWKET-----LSF-GFHDGA-----ASPVVVD-----  
--YFAGTLGQDF-EAV-----GRVY-QRYCEEMKA  
LSLTIMELLEL-SL----G---V----E----RG-----YYRDFE-----EDSRSIMRC  
NYYPPC-PEP-----E-RT--LGTGPHCDPTALTILL-  
QD---D-VGGLEVL--VD-----G-----DWRPVRP----VPGA--MVINIGDT  
FMALSNGRYK-----SCLHRA-VV-----N--QR-QERRSLAFFLCPREDRVVRPPA--  
-----SGAVGEAP-RR---YPDFTW----ADLMRFTQR-HYRAD-----  
-----TRT-----LDAF  
TRWLSHGPAQDAPVAAAAS-----  
>Zm00001d012212\_P001

MRPRLPPNVPSLPSLSLLANSLSPPVTNTPTRPDSFPAYLQLAHLMVSRQERQEPAPVSS  
SSSSAKRAATSMDASPAPLLLRAPTPSPSIDLPAGKDKADAAASKAGAAVFDLRREPKI  
PAPFLWP---QEEAR-----PSSAAEL-----EVPMDVDVGVL  
R--NGD-----RAGLRR-----AAAQ-VAAACATHGFFQVCG--HGV----  
DAA--LGRAALDGASDFF-RLPLAEKQRARR-----VPG-T--VSGY TSA-HAD  
RFA--AKLPWKET-----LSF-GYHDGA-----ASPVVVD-----  
--YFVGTGQDF-EPM-----GWVY-QRYCEEMKE  
LSLTIMELLEL-SL----G---V----EL---RG-----YYREFF-----EDSRSIMRC  
NYYPPC-PEP-----E-RT--LGTGPHCDPTALTILL-  
QD---D-VGGLEVL--VD-----G-----EWRPVRP----VPGA--MVINIGDT  
FMALSNGRYK-----SCLHRA-VV-----N--QR-RARRSLAFFLCPREDRVVRPPA--  
-----SAA----P-RR---YPDFTW----ADLMRFTQR-HYRAD-----  
-----TRT-----LDAF  
TRWLSHGPAQAAAPPCT-----  
>Zm00001d042611\_P001

-----  
-----MDASPTPLPLRAPTPSIDLPAGKDRADAAANKAAAVFDLRREP  
PEPFLWP---HEEAR-----PTSAAEL-----EVPVVDVGV  
R--NGD-----GAGLRR-----AAQ-VAAACATHGFFQVCG--HGV---  
DAA--LGRAALDGASDFF-RLPLAEKQRARR-----VPG-T--VSGYTS  
HAD  
RFA--SKLPWKET-----LSF-GFHDGA-----AAPVVVD-----  
--YFTGTLGQDF-EPV-----GRVY-QRYCEEMKE  
LSLTIMELLE-SL---G---V---E---RG-----YYREFF-----EDSR  
SIMRC  
NYYPPC-PVP-----E-RT--LGTGPHCDPTALTILL-  
QD---D-VGGLEVL--VD-----G-----EWRPVRP----VPGA--M  
VINIGDT  
FMALSNGRYK-----SCLHRA-VV-----N--RR-QERQSLAFFLC  
PREDRVVRPPA--  
-----SAA---P-RQ---YPDFTW---ADLMRFTQR-HYRAD-----  
-----TRT-----LDAF  
TRWLSHGPAAPCT-----  
>OQU87995

-----MRPRLPPNVPLSLLANSLSPLPCTLAHLMVSQERQE  
PALPLPSNSSAKRAASMDASSAPPLLLRAPTPSPSIDLPAAAGKAAAVFDLRREP  
KI  
PAPFLWP---HEEAR-----PTSAAEL-----EVPVVDVGV  
R--NGD-----RAGLRR-----AAQ-VASACATHGFFQVCG--HGV---  
DAA--LGRAALDGASDFF-RLPLADKQRARR-----VPG-T--VSGYTS  
HAD  
RFA--SKLPWKET-----LSF-----GFHDGAASPVVVD-----  
--YFTGTLGQDFEPMG-----RVY-QRYCEKMKE  
LSLTIMELLE-SL---G---V---E---RG-----YYREFF-----EDSR  
SIMRC  
NYYPPC-PEP-----E-RT--LGTGPHCDPTALTILL-  
QD---D-VGGLEVL--VD-----G-----EWRPVRP----VPGA--M  
VINIGDT  
FMALSNGRYK-----SCLHRA-VV-----N--QR-QERRSLAFFLC  
PREDRVVRPPA--  
-----SSA---TPRQ---YPDFTW---ADLMRFTQR-HYRAD-----  
-----TRT-----LDAF  
TRWLSHGVPVPAQEAPCT-----  
>LOC\_Os05g34854.1

-----MHASPHPLQIAHDTLLSLTHT  
LCTAETGSTIRTGTAMVYISNAQDASKLIVTAKGGGGEADDAAASSAAVLDLWRQPA  
KI  
PAPFVWPRADVALPP---SSPPTGEL-----DVPVVDLAAA  
L--RD-----AAGMRR-----AVAQ-VAAACASHGFFQVSG--HGV---  
PPS--LARAALDGAAGFF-RLPPAAKQRARR-----APG-T--VTGYTAA-  
HAD  
RFV--DNLPWKET-----LSF-GHRHAN-----AAGNNSSTVA-----  
--DYFSTLGDDF-KHL-----GEVY-QEYCEAMEE  
VTKAIMAVLGE-SL---G---V---G---GG-----YYREFF-----EDSS  
SIMRC  
NYYPPC-PEP-----E-RT--LGTGPHCDPSALTVLL-  
QD---GDVDGLQVL--VA-----G-----AWRPVRP----LPGA--FV  
VINIGDT  
FMALTNGRYK-----SCLHRA-VV-----H--RE-QERRSLAFFLC  
PREDRVVRPPA--  
--GAG-----AGE---R-RL---YPDFTW---ADFMRTQR-HYRAD-----  
-----TRT-----LDAF  
ARWLRPPACSGAAPVVGPPPTTATQAATV-----

>EES19547

-----  
-----MPENPHHGSSDRLALVGKQVDRRLLPVSPAADDGKDDNGAAVINLWGQLKI  
PDPFVWS---HAETM-----VSSEREL-----DAPVVDVGAA  
M--RGDDDDC-----GAGIRR-----AAEL-VSGACSSHGLFQVTG--HGL----  
DPA--LARAALDGAAFF-RLPLATKQRASR-----APG-N--VTGYTAA-HAD  
RFT--ANLPWKET-----LSF-----GHRDRRTSGSHVVVD-----  
--YFTSTLGSDF-KPL-----GVVYQNYCNAMKE  
VSLAIMEVIGV-SL---G---V---G---RS-----YYRDF-----ADGSSIMRC  
NYYPPC-PEP-----E-RT--LGTGPHCDPSALTVLL-  
QD---GDVDGLQVL--VD-----G-----EWRTVRP----RPGA--LVVSIGDT  
FMALSNGRYR----SCLHRA-VV-----H--RE-RERRSLVFFLCPREDRVVRPPP--  
RLLLAVAAREQQQEQ-----PRRR---YPDFTW----ADLARFTQR-HYRAD-----  
-----AGT-----LDAF  
ARWLGAAPTCAAATSAASQSPDKAHETV-----  
>KQK06181

-----  
-----MVDYQLSNSGEPNATTPIAAMDQVGRNPLLLFGPADDSKNAIIPWRQSKQI  
PDSFVWP---HADTH-----PPSSSTTTTTEL-----LDVPVVDLAAA  
L--RD-----AAGMRD-----AAAQ-AAAACASHGFFLVGT--HGV----  
DPA--LARAALDGAAGFF-RLPLATKQRARR-----VTG-S--VAGYAAA-HAD  
RFA--ANLPWKET-----LSFRHHHDDD-----DRDAVLD-----  
--YFTSTLGDDF-KPL-----GEVY-QEYCGAMEA  
ASLAIMEVLGV-SL---G---V---G---RG-----HYRDF-----ADGSSVMRC  
NYYPPC-PEP-----D-RT--LGTGPHCDPSALTLLM-  
QD---GGVDGLQVL--VD-----G-----GWRPVRP----KPDE--LVVNIGDT  
FMALSNGRYK----SCLHRA-VV-----H--RE-RERRSLAYFLCPRKDRVVRPPP--  
-STT-----APA---P-RL---YPDFTW----ADLSRFTQR-HYRAD-----  
-----ART-----LDAF  
ARWLGPAKAQEIV-----  
>HORVU1Hr1G063780.2

-----  
---MVDVSNFVEANGNAAVSIPAMEVAGSPHVPFVPRDANATDSKNAKDVLDLWRQQKQI  
PAPFIWP---HADAR-----PSSILEL-----DVPVVDIGAA  
L--HS-----AAGMAR-----AAAQ-VAEACASHGFFQVTG--HGV----  
DPA--LAQAALDGAADFF-RLPLATKQRARR-----SPG-T--VKGYASA-HAD  
RFA--AKLPWKET-----LSFIHNVHVE-----DVGARASSHVVD-----  
--YFTSALGDDFMHLG-----EVY-QEYCEAMED  
ASLAIMEVLGV-SL---G---L---G---RG-----YYRDF-----ADGSSIMRC  
NYYPRC-PEP-----D-RT--LGTGPHCDPSALTILL-  
QD---GEVDGLQVL--VD-----G-----AWRSVRP----KPGE--LVVNIGDT  
FMALSNGRYK----SCLHRA-VV-----H--RE-KERRSLAYFLAPQEDRVVRPPP--  
-----SPAPA---P-RL---YPDFTW----AELMRFTQR-HYRAD-----  
-----ART-----LDAF



ACWLDLPSCPATPQAQGTV-----  
>HORVU3Hr1G089980.1

-----  
-----MASLVFDAAVLSRKEDI  
PPQFIWP---ADEAP-----SVDGVEE-----IVVPVVDLAGF  
L--AGDD-----AGLNELVAACERHGFFQVVN--HGV----  
DPA--LLAKAYRCCDAFY-ALPLAEKQRAQR-----RLG-E--NHGYAGS-FVG  
RFG--SKLPWKET-----MSF-----NCSAAPESARKVVD-----  
--YFVGVLGEEY-RHM-----GDVW-QEYCNEMTR  
LALDVTEVLAA-CL----G---L---D---RG-----ALRGFF-----AGDDSLMRL  
NHYPPEC-KKP-----H-LT--LGTGPHHDPTALTLLH-  
QD---D-VGGLEVF--TG-----G-----AWRAVRP---RSDA--FVVNIGDT  
FSALTNGRHV-----SCLHRA-VV-----N--GS-LARRSLTFFLNPLDRPVTTPA--  
-ELLAI-----DGR---P-RV---YPDFTW---REFLEFTQK-HYRSD-----  
-----SRT-----LDAF  
VAWINQGHTG-----  
>KQL22579

-----  
-----MAAPAGADEPCSAAQACSMVVFDAEVLSREESI  
PAQFVWP---PEERA-----PAAGLGV-----EEMDIPVVDLAEF  
-----LRGGGE-----LPVG-MAEACERHGFFQVVG--HGV----  
GAE--LIAEAYRCCDAFY-AHPLAEKQRARR-----LPG-E--SHGYASS-FTG  
RFD--SRLPWKET-----LSF--HCPAA-----AAPGSAGGRAVAD-----  
--YIVGVLGEEY-RHM-----GEVY-QEYCDAMTR  
LALDVTEVLAA-AL----G---L---PD---RG-----VLRGFF-----AGGDSVMRL  
NHYPPEC-RQP-----H-LT--LGTGPHRDPTSLTLLH-  
QD---C-VGGLQVR---A-----GGDGGGGGEWLAVRP---RADA--FVVNIGDT  
FAALTDGRHA-----SCLHRA-VV-----S--GG-AARRSLAFFLNPLDRVVCPE--  
-ALLP-----AGR---P-RA---YPDFKW---RELLEFTQK-RYRSD-----  
-----AST-----MDAF  
VSWIARGRGDGGGGGHDHGGQEEEK-----  
>Zm00001d007894\_P001

-----  
-----MAAAAVVFDAEALSREEHI  
PAQFVWP---TEERA-----PAGGVEE-----VAIPVVDLGEF  
L--RRGV-----LPRG-VAEACERHGVFQVVN--HGV----  
GAA--LLAEAYRCCDAFY-ALPLADKQRAQR-----RHG-E--NHGYASS-FTG  
RFH--CCLPWKET-----LSF-----NCPAGAGTARAVVG-----  
--YFVDVLGEDY-RHMGSLLLYPIFLRACACHAARTETGKKCR---EVY-QEYCDAMTR  
LALDVTEVLAA-AL----G---L---D---RG-----ALRGFF-----EGGDSVMRL  
NHYPAC-RQP-----H-LT--LGTGPHRDPTSLTLLH-  
QD---D-VGGLQVR--AG-----G-----GPWRAVRP---RADA--FVVNIGDT  
FAALTDGRHT-----SCLHRA-VV-----T--GG-GSRRSLAFFLNPLDRVVRPPG--  
-ALLQENKQ---AGR---P-RA---FPDFTW---REFLEFTQK-HYRSD-----

```

-----AGT-----MDAF
VSWIAGGRRHHGGQEEGN-----
>EER95912

-----
-----MAAAGVVFD AEVLSREERI
PAQFVWP---AEDRA-----PSAGGCG-----VEEIAIPVVDLGEF
L-----RHGDRE-----LPRG-VAEACERHGFFQVVN--HGV----
PAA--LLADAYRCLDAFY-ARPLADKQRAQR-----RPG-E--SHGYASS-FTG
RFR--SCLPWKET-----LSF---NCPA-----GTGGDTQSAAAVVD-----
--YFVDVLGEDY-RHMG-----EVY-QEYSDEMAR
LAMDVTEVLAA-AL---G---L---R---RG-----ALRGFF-----DGGDSIMRL
NHYPAC-RQP-----Q-LT--LGTGPHRDPTSLTLLH-
QD---D-VGGLQVC--AG-----G---GGGGEWRAVRP----RADA--FVVNIGDT
FAALTDGRHA-----SCLHRA-VV-----S--GD-RARRSLAFFFNPLDRVVRPPD--
-ALLL-----EDEKRRRP-RA---FPDFTW----REFLEFTQK-HYRSD-----
-----AST-----MDAF
VSWIAGGRGDGHGGRQEGK-----
>LOC_Os07g07420.1

-----
-----MAAVVFDAAILSKQEI
PAQFVWP---ADEAP-----AADDGVV-----EEIAIPVVDLAAF
L--ASGG-----IGRD-VAEACERHGFFQVVN--HGV----
DPA--LLAEAYRCCDAFY-ARPLAEKQRARR-----RPG-E--NHGYASS-FTG
RFD--CKLPWKET-----MSF-----NCSAAPGNARMVAD-----
--YFVDALGEEY-RHM-----GEVY-QEYCDVMTR
LALDVTEVLAV-AL---G---L---G---RG-----ELRGFF-----ADGDPVMRL
NHYPAC-RQP-----H-LT--LGTGPHRDPTSLTLLH-
QD---D-VGGLQVL--PD---DAAAAG-----GWRAVRP----RADA--FVVNIGDT
FAALTNGRHA-----SCLHRA-VV-----N--GR-VARRSLTFFLNPRLDREVSPPP--
-ALVD-----AAH---P-RA---FPDFTW----REFLEFTQR-HYRSD-----
-----TNT-----MDAF
VAWIKQRNGYESLDKY-----
>KQK20711

-----
-----
----VWP---ADEAP-----PTTVEEI-----SIPVIDLAAF
L--S-----GSGDFS-----GEDH-FAAACERHGFFQIVN--HGV----
DPS--LLAEAYRCMDAFY-ALPLAEKQRAQR-----RLG-E--NHGYAGS-FTG
RFE--SRLPWKET-----MSF-NYSDAP-----G-----NASKVVD-----
--YFVSVLGEEY-RQM-----GEVW-QGYCDVMTR
LAQDVTDLLAV-GL---G---L---G---RG-----GLRAFF-----AGGDSVMRL
NNYPPC-RQP-----H-LT--LGTGPHRDPTSLTLLH-
QD---L-VGGLQVF--VG-----G-----EWRAVRP----REDA--FVVNIGDT
FAALVDGRHA-----SCLHRA-VV-----N--GA-AARRSLTFFLNPRLDREVSPPP--

```

-GLLLAEDVDG-GAI----N-RK---YPDFTW----REFLEFTQK-HYRSD-----  
 -----TNT-----MDAF  
 VDWIKQGRR-----  
 >KQK20710  
 -----  
 -----MALEFDATILSRAPVI  
 PPQFVWP---ADEAS-----PAAVGEI-----AIPVIDLAAF  
 L--S-----GSGDFS-----GADH-FAACERHGFFQIVN--HGV-----  
 DPA--LLAEAYRSMDAFY-ALPLAEKQRAKR-----RLG-E--NHGYAGS-FTG  
 RFE--SRLPWKET-----MSF-NCSDAP-----E-----NASKVVD-----  
 --YFVSVLGEEY-RQM-----GEVW-QEYCDVMTR  
 LALDVTDLLAV-GL---G---L---G---RG-----ALRGFF-----AGGDSVMRL  
 NNYPPC-RQP-----H-LT--LGTGPHRDPTSLTLLH-  
 QD---L-VGGLQVF--VG-----G-----EWRAVRP---REDA--FVVNIGDT  
 FAALVDGRHA-----SCLHRA-VV-----N--GA-AARRSLTFFLNPPDRVVSPPQ--  
 -GLLVAKDG---GAI----N-RK---YPGFTW----REFLEFTQK-HYRSD-----  
 -----TNT-----MEAF  
 VDWIKQGRRGAQFHGDAGQAEKN-----  
 >LOC\_Os03g63970.1  
 -----  
 -----MSMVVQQEQEVVFDAAVLSGQTEI  
 PSQFIWP---AEESP-----GSVAVEE-----LEVALIDVGAG  
 AERSS-----VVRQ-VGEACERHGFFLVVN--HGI-----  
 EAA--LLEEAHRCMDAFF-TLPLGEKQRAQR-----RAG-E--SCGYASS-FTG  
 RFA--SKLPWKET-----LSF-----RYSSAGDEEGEEGVGE-----  
 --YLVRKLGAEHGRRLL-----GEVY-SRYCHEMSR  
 LSLELMEVLGE-SL---G---I--VGDR---RH-----YFRRFF-----QRNDSIMRL  
 NYYPAC-QRP-----L-DT--LGTGPHCDPTSLTILH-  
 QD---H-VGGLEVW--AE-----G-----RWRAIRP---RPGA--LVVNVGDT  
 FMALSNARYR-----SCLHRA-VV-----N--ST-APRRSLAFFLCPMDTVVRPPE--  
 -ELVD-----DHH---P-RV---YPDFTW---RALLDFTQR-HYRAD-----  
 -----MRT-----LQAF  
 SDWLNHHRHLQPTIYS-----  
 >KQK86097  
 -----  
 -----MVQAALDDTKQQQQPPLVFDAARLSGQADI  
 PEQFLWP---ADESP-----TPDAVEE-----LPVPLIDLSG-  
 -----GAANAE-----VVRQ-VGDACGLHGFFQVVN--HGI-----  
 DPA--LLAEAHRCMDTFF-TLPLADKQRAQR-----RPG-E--SCGYASS-FTG  
 RFA--SKLPWKET-----LSF-RYSPSD-----DVAGEQLVSS-----  
 --YFVEKLGEAY-RHH-----GEVY-GRYCSEMSR  
 LSLEIMEVLGE-SL---G---V---G---PS-----HFRRFF-----EGNDSIMRL  
 NYYPPC-QRP-----Y-DT--LGTGPHCDPTSLTILH-  
 QD---D-VGGLQVF--AG-----G-----RWRSIRP---HAGA--FVVNIGDT

FMALSNGRYR-----SCLHRA-VV-----N--SR-VPRRSLAFFLCPMDKVVVRPPG--  
 -ELVD-----DRN---P-RA---YPDFTW----RALLDFTMR-HYRAD-----  
 -----MRT-----LEAF  
 SNWLLIHGNNSHQL-----  
 >Zm00001d034898\_P001  
 -----  
 ---MAAHWQAGRAGTSKQAVAVAAASSSASSLLLLTMVLAHDPPPLVFDAARLSGLSDI  
 PQQFIWP---ADESP-----TPDSAEE-----LAVPLIDLSDG  
 A--AE-----VVRQ-VRRACDLHGFFQVVG--HGI----  
 DAA--LTAEAHRCMDAFF-TLPLPKQRAQR-----RQG-D--SCGYASS-FTG  
 RFA--SKLPWKET-----LSF-RYTDDD-----DGDKSKDVVAS-----  
 --YFVDKLGEFY-RHH-----GEVY-GRYCSEMSR  
 LSLELMEVLGE-SL---G---V---G---RR-----HFRRFF-----QGNDSIMRL  
 NYYPPC-QRP-----Y-DT--LGTGPHCDPTSLTILH-  
 QD---D-VGGLQVF-----D---AATLAWRSIRP----RPGA--FVVNIGDT  
 FMALSNGRYR-----SCLHRA-VV-----N--SR-VARRSLAFFLCPMDKVVVRPPK--  
 -ELVD-----DAN---P-RA---YPDFTW----RTLLDFTMR-HYRSD-----  
 -----MRT-----LEAF  
 SNWLSTSSNGGQHLEKK-----  
 >EER90481  
 -----  
 -----MVQQASLGEPLLLQPPPPSLVFDAARLSGLSDI  
 PQQFLWP---ADESP-----TPDAAEE-----LAVPLIDLSDG  
 A--AE-----VVRQ-VRRACDLHGFFQVVN--HGI----  
 DDA--LLQEAHRCMDAFF-TLPMSDKQRAQR-----RQG-D--SCGYASS-FTG  
 RFA--SKLPWKET-----LSF-----RYSDDQGDGDVVVD-----  
 --YFVDKLGDAYRHG-----EVY-GRYCSEMSR  
 LSLELMEVLGE-SL---G---V---G---RR-----HFRRFF-----QGNDSIMRL  
 NYYPPC-QRP-----Y-DT--LGTGPHCDPTSLTILH-  
 QD---D-VGGLQVFDAAT-----G---PGTGRWRSIRP----HPGA--FVVNIGDT  
 FMALSNGRYR-----SCLHRA-VV-----N--SR-VPRRSLAFFLCPMDKVVVRPPA--  
 -ELVD-----DAN---P-RA---YPDFTW----RTLLDFTMR-HYRSD-----  
 -----MRT-----LEAF  
 SNWLNHGGHLSSPPPP-----  
 >KQK12006  
 -----  
 -----MVMQPVLFDAAVLSGRSDI  
 PSQFIWP---ADESP-----TPDAAEP-----LDVPLIDIGGI  
 V--AS-----GAGDRA-----AAVASVARLVGDACSRHGFFQVVN--HGI----  
 DAA--LLADAHRCVDAFF-KLPLAEKQRALR-----RPG-E--SCGYASS-FVG  
 RFS--SKLPWKET-----LSF-----RSSPSCPDLPD-----  
 --FILSNLGEFH-RRL-----GEVY-ARYCEMSR  
 VSLELMEVLGE-SL---G---V---G---RS-----HYRSFF-----EGNDSIMRL  
 NYYPPC-QRP-----Y-ET--LGTGPHCDPTSLTILH-

QD---A-VGGLQVH--VD-----G-----RWRAIAP----RQDA--FVVNIGDT  
FMALSNGRYK-----SCLHRA-VV-----N--SK-VPRKSLAFFLCPEMDKTVAPPG--  
-KLVD-----EEN----P-RV---YPDFTW----RALLDFTQK-HYRAD-----  
-----MKT-----LEV  
SGWVLQQQKQKQLGS-----  
>HORVU5Hr1G124120.2

-----MVQPVFDAAVLSGRDI  
PSQFIWP---EGESP-----TPDATEE-----MHVPLIDIGGM  
L--SGD-----PRAAAE-----VTRL-VGEACERHGFFQVVN--HGI----  
DAQ--LLADAHRCVD AFF-TMPLPEKQRALR-----RPG-E--SCGYASS-FTG  
RFA--SKLPWKET-----LSF-----RSCPSDPALVVD-----  
--YIVATLGEDHRRLG-----EVY-ARYCSEMSR  
LSLEIMEVLGE-SL---G---V---G---RA-----HYRRFF-----EGNESIMRL  
NYYPPC-QRP-----L-ET--LGTGPHCDPTSLTILH-  
QD---D-VGGLQVH--TD-----G-----RWRSIRP----RADA--FVVNIGDT  
FMALSNGRYK-----SCLHRA-VV-----N--SR-VPRKSLAFFLCPEMDKVVAPPG--  
-TLVD-----AAN----P-RA---YPDFTW----RSLDFTQK-HYRAD-----  
-----MKT-----LEV  
SSWVVQQQPASART-----  
>LOC\_Os01g22910.1

-----MGWDEPTFRGVWLRGEWDGLVPGEYSSQIRDQLIGENVADELVPPGTSER  
RDDAFLP---RSRCS-----PSGATAD-----GSGDGD SGRL  
G--DGDHAGLGDDDRGGGASAMARRIQWWGGQRRL-IRRWGGLWRWIRRRG---GA----  
AAA--CEEEVEGRRRIRRWGLRWLARRSSRGRS-----GGGVRGGGRGAAADPAMG  
GAA--TAFPLALAHRRFLLLLLAAGSSSSCGDGEDCGGRSGDRLTES-----  
--LFVDIGLESDCR-----QVV-NDYVEAVRQ  
LACHVLDLLGE-GL---G---L---RD---PT-----SLTRLI---TATDNDSLIRI  
NHYPSCAAAAGDHKS-----GGGPAPT-AA--IGFGEHTDPQILSVLR-  
AN---D-ADGLQLL--LP---DAAAA-G---DS-VWVPVPP---DPSA--FFVNVGDL  
LQALTNGRLV-----SIRHRV-VV-----G--TG-KPRLSTIYFAAPPLHARISALP--  
-ETVA-----AGA----P-RR---YRAFTW-----AEYKRT-MYTLR-----  
-----LSHNR-----LDLF  
HAGDGDGDAGVGDDDDHE-----  
>LOC\_Os05g06670.1

-----MVVPSATTPARQETVVAAPPA  
AASGVVG---GGGGV-----TIATVDM SAE  
R--GA-----VARQ-VATACAAHGFFRCVG--HGV----  
PAAAPVAARLDAATAAFF-AMAPA EKQRA-----GPA-S--PLGYGCR-SIG  
-FN--GDVGELEY-----LLL-----HANPAAVAHRAR-----  
--TIDAMDPSRF-----SAIVNEYIEAMKK  
LACEILDLLGE-GL---G---L---KD---PR-----YFSKLT---TNADSDCLLRI

NHYPPS-CNIHKLDHDDQCNIKSLVSTKASNGGNLMAG-GR--IGFGEHSDPQILSLLR-  
AN---D-VEGLQVF--VP-----DHEG----KE-MWVQVPS----DPSA--IFVNVGDV  
LQALTNGRLI-----SIRHRV-IA-----T--AC-RPRLSTIYFASPPLHARISALP--  
-ETIT-----ASS----P-RR---YRSFTW-----AEYKKT-MYSLR-----  
-----LSHSR-----LELF  
KIDDDSDNASEGKA-----  
>KQK99291

-----TVV-NEYVGAVRQ  
LACEILDLLGE-GL----G---L---KD---PR-----SFSKLI---TDTSDSLLRI  
NHYPPA-CTIHKLDHDGQCKMKSIVRTKNGNGVNPASAG-AR--IGFGEHSDPQIISLLR-  
AN---D-VNGLQVL--LP-----NSDG----KE-VWIKVPA----DPSA--FFVNVGDL  
LQALTNGKLV-----SVRHRV-IA-----S--AC-RPRLSTIYFAAPPLHAQISALP--  
-ETIT-----AAS----P-RQ---YRSFTW-----AEYKKT-MYSLR-----  
-----LSHSR-----LDLF  
HVGDDDNSNVGKGEQE-----  
>Zm00001d024175\_P001

-----MVPSTTPVV  
RQQTTPP--QSSHAG-----GIPTVDLSAH  
GGRGA-----LSRQ-VVRACAEHGFFRAVN--HGV----  
PPG--PAARLDAAARTFF-ALAPRDKQRA-----GPP-S--PLGYGCR-SIG  
-FN--GDAGELEY-----LLL-----HANNPAAVAHRAR-----  
--AIDAEPSRF-----SNVV-NEYVGAMRQ  
LACEILDLLGE-GL----G---L---ED---PR-----SFSKLI---TDTSDSLLRI  
NHYPTA-CNAHNLDHDSQCKMKSSVRTKTTSNGVKPSAGGR--VGFEHSDPQILSLLR-  
AN---D-VDGLQVLLNAD-----G-----KEVWVQVPA----DQSA--FFVNVGDL  
LQALTNGKLV-----SVRHRV-IA-----S--SS-RARLSTIYFAAPPLHARILALA--  
-ETIT-----ANA----P-SQ---YRPFTW-----AEYKKT-MYSLR-----  
-----LSHSR-----LNLF  
HIDHDGHSNVGEGEE-----  
>Zm00001d037565\_P002

-----MVPSTTPVV  
RQETPPP---SHDGI-----GIPTVDLSAP  
GGRGA-----LSRQ-VARACAHGFFRAVN--HGV----  
APG--PAARLDAAARTFF-ALAPHNKQRA-----GPP-S--PLGYGCR-SIG  
-FN--GDAGELEY-----LLL-----HANPAAVAHRAR-----  
--SIDTDDPSRF-----SNVV-NEYVGAMRQ

LACEILDLLGE-GL----G---L---KD---PR-----SFSRLI---ADTSDSLLRI  
NHYPPT-CAIHKLDHDSQCRMKNSFRIVAGNGANQSAG-AR--IGFGEHSDPQILSLLR-  
SN---D-VDGLQVLLNSD-----G-----REVWVQVPA----DPSA--FFVNVGDL  
LQAFITNGKVI-----SVRHRV-IA-----S--SS-RARLSTIYFAAPPLHARILALP--  
-ETVT-----ANS----P-RQ---YRPFTW-----AEYKKT-MYSLR-----  
-----LSHSR-----LNLF  
HIGHDDHGKGEQE-----  
>OQU77483

-----MVVPSSTPVVV  
RQETPPP---PLPLP-----PSHDGII-----GIPTVDM SAP  
GGRGA-----LSRQ-VARACAEHGFFRAVN--HGVAVAP  
AAG--PAARLDAAARTFF-ALPPHDKQRA-----GPP-S--PLGYGCR-TIG  
-FN--GDAGELEY-----LLL-----HANPAAVAHRAR-----  
--SIDTDDPSRF-----SNVV-NEYVGAMRQ  
LACEILDLLGE-GL----G---L---KD---PR-----SFSKLI---TDTSDSLLRI  
NHYPPT-CTIQKLDHDNQCKMKSSFRIKTGNGVNSAG-AR--IGFGEHSDPQILSLLR-  
SN---D-VDGLQVLLNCD-----G-----REVWVQVPS----DPSA--FFVNVGDL  
LQALTNGKVI-----SVRHRV-IA-----N--SC-RARLSTIYFAAPPLHARILALP--  
-ETIT-----ANS----P-RQ---YRPFTW-----AEYKKT-MYSLR-----  
-----LSHSR-----LNLF  
HIDHDDHSNVGKGEQE-----  
>KQK07366

-----MVVPSSTTPARQ  
EIATAAA---ALQLP-----AIPTVDM SAP  
R--GL-----LSRQ-VARACAEQGFFRAVN--HGVLVPG  
PAP--AARQLDAATAAFF-ALPAHEKQRARGVQGG-----GPPSS--PLGYGCR-TIG  
-FS--GDVGELEY-----LLL-----HANDPAYKAA-----  
--SIHAHDPKHF-----SCVVNEYVEAVKQ  
LACDILDLLGE-GL----G---L---ED---PR-----SFSKLI---TEPDSDSLLRI  
NHYPPT-CTVHKLDHDGQCKLKGTACRAKAGNGGNPTGGGR--IGFGEHSDPQILSLLR-  
AN---D-VDGLQVL--LP-----DVNG-----KEVWIQVPA----DSSA--FFVNVGDL  
LQALTNGKLL-----SVRHRV-IA-----S--AC-RPRLSTIYFAAPPLHARISALP--  
-ETVT-----AGS----P-RR---YRSFTW-----AEYKTT-MYSLR-----  
-----LSHSR-----LDLF  
CVHDDDDNSSDVSKEK-----  
>HORVU1Hr1G023460.3

-----RQE  
TATLLLP---QAQPS-----PGGG-----AIPTVDM SAP  
RGRGA-----LSRQ-VARACAEQGFFRAVN--HGV---P  
PAG--PPARLDAATS AFF-ALAAHDKQRA-----GPP-S--PLGYGCR-SIG  
-FN--GDVGELEY-----LLL-----HANPAAVAHRAS-----

--SIDTNDPSRF-----SSVV-NEYVEAVKQ  
LACDILLDLGE-GL---G---L---ED---PR-----LFSKLV---TEADSDSLLRI  
NHYPTKAGNGANPGAG-----GR--IGFGEHSDPQLLSLLR-  
AN---D-VDGLQVL-LPD-----VNG-----KDAWIQVPA---DSSA--YFVNVGDL  
LQALTNGRLV-----SIRHRV-IA-----S--AC-RPRLSTIYFAAPPLHARISALP--  
-EMVT-----ASS----P-RR---YRSFTW-----AEYKTA-MYSLR-----  
-----LSHSR-----LDLF  
HVDDDESGNA-----  
>KQL05037

-----MVVPSAASRDMA  
PESLPLG-----IIPTVDMSAP  
SGRGD-----LARR-LVRACAERGFFKAVN--HGV----  
PAR--AAARLDAAASAFF-ARPARAKQAA-----GPP-D--PLGYGSR-NIG  
-GN--GDVGELEY-----LIL-----HADPAAVARKAT-----  
--VIDAEDPSRF-----SVAVNEYVDAVRR  
LACRVLDLLGE-GL---G---F---RD---PT-----SLSQLI---SAVDSDSLLRI  
NHYATSAAAL-----QGPGRSCTK-GS--IGFGEHTDPQILSVLR-  
AN---D-VDGLQVL-LPD-----G--CGGGDEWVPVPA---DPAA--FFINVGDL  
LQALTNGRLV-----SIRHRV-MA-----S--TT-RPRLSTIYFAAPPLRALIAALP--  
-ETVA-----AGT----P-RR---YRPFTW-----AEYKKA-MYAHQ-----  
-----LSHNR-----LDLF  
HASSDDAADDGHS-----  
>Zm00001d040737\_P001

-----MVAPSAAAGRDMA  
PESLPLG-----IIPTVDMSAP  
SGRGE-----LARR-LVRACAERGFFKAVN--HGV----  
PPR--VSARLDAATSFAFF-ARPAPVKQAA-----GPP-D--PLGYGSR-NIG  
-AN--GDVGELEY-----LIL-----HAQPAAVARKAM-----  
--VIDAEDPSRF-----SVAVNEYVDAVRR  
LACRVLDLLGE-GL---G---L---GD---PT-----SLSRFV--SAVVDSDSVLRI  
NHYPTS-SAAADVS-----A-KG--IGFGEHTDPQILSLLR-  
AN---D-VDGLQVL--LP---DARGGSG----GD-QWVQVPA---DPSA--FFINVGDA  
LQALTNGRLV-----SIRHRV-MA-----S--TT-RPRLSTIYFAAPPLDARIAALP--  
-ETVV-----AGA---A-RR---YRTFTW-----AEYKKA-MYALR-----  
-----LSHNR-----LDLF  
HADASSGGSGDKKHDl-----  
>EES02896

-----MVVPSAAGREMA  
PESLPLG-----IIPTVDMSAP  
C--GE-----LARR-LVRACAERGFFKAVN--HGV----  
PPR--VSARMDAAASAFF-ARPGQAKQAA-----GPP-D--PLGYGSR-NIG



-AN--GDVGELEY-----LIL-----HADPGAVARKAK-----  
--VIDKDDPSRF-----SVAVNEYVGAVRH  
LACRVLDLLGE-GL---G---L---RD---PT-----SLSRLI---SAVSDSLLRI  
NHYPSTRSSAADI-----STKG--IGFGEHTDPQILSLLR-  
AN---D-VDGLQVL-LPD-----G-HGGGDEQWVQVPA----DPSA--FFINVGDL  
LQALTNGRLV-----SIRHRV-MA-----S--TT-RPRLSTIYFAAPPLDARVAALP--  
-ETVT-----AGA---P-RR---YRTFTW-----AEYKKA-MYALR-----  
-----LSHNR-----LDLF  
HATSGSSRDVIDDDHEQ-----  
>KQK04223

-----MVMPASTASSAAC  
RDTASGA-----GIPTVDM SAP  
WGAE-----LSRQ-MVEAFAERGFFKAVN--HGV----  
PPR--APATLDAATAAFF-ERPAPEKQAA-----GPP-D--PLGYGSR-SIG  
-SH--GDVGELEY-----LTL-----HADPAAVARRAV-----  
--AIDREDPSRF-----SEAV-NEYVGAVRR  
LACQILDLLGE-GL---G---L---ED---PT-----ALSKII---TVSDSDSIIRI  
NHYPSSAAA-----SS--VGFGESDPQILSVLR-  
AN---D-VDGLQVL-LPD-----G---RGQDTWVQVPA----DPAA--FFINVGDL  
LQALTNGRLV-----SIRHRV-MA-----S--TS-KPRLSTIYFAAPALHALISALP--  
-ETVT-----SDA---P-RR---YRPFTW-----AEYKKN-MYTLS-----  
-----LSHNR-----LELY  
NAVNADAGEARPRSGIAS-----  
>HORVU7Hr1G101720.1

-----ASSSAAAVA  
PACR-----GMAPA-----GIPTIDMSAP  
AGRAE-----MSRQ-MVEAFAERGFFKAVN--HGV----  
PPR--ASARLDAASAAFF-ARPAEEKQEA-----GPP-D--PLGYGSR-SIG  
-SH--GDVGELEY-----LIL-----HTDPEVVARKAR-----  
--AVDRDDPSRF-----SEAV-NEYVQAVRH  
LACRILDMLGE-GL---G---L---RD---PA-----SLSRLI---TTTDGDSLVR  
NHYPASAAGDGGVK-----AASS--VGFGESDPQILSVLR-  
AN---D-VDGLQVL--LP---DGR---G---ED-AWVQVPA----DPAA--FFINVGDL  
LQALTNGKLV-----SIRHRV-MA-----S--SS-KPRLSAIYFAAPALHERISAFP--  
-ETVT-----AAA---P-RR---YRPFTW-----AEYKKT-MYTLR-----  
-----LSHNR-----LDLF  
AVVGDSGEDKPRI-----  
>HORVU3Hr1G029010.7

-----GGPCQGRAGADSPAGGAAAAGPRAG  
DRPVRRP---GARPR-----RRGARAG-----VRVRGAGLLQGDRP  
R--G-----AAGARARRGGGRGVLRAAAGREGG----

RRR--PAARVRQQADRRL-RRPRVDR-----VPPAGRHPRRRAAR-RLL  
RVLDIAVRGRRRG-----VVV-----RAPLPLTVSSSVR-----  
-----SDLL-EEYAAAVRR  
MACGVLELMAE-GL----G---I---GP---AD-----ALSRLV---SDGESDNMLRV  
NHYPPIR-PEMQG-----R-LL--TGFGHTDPQIISVLR-  
SN---G-TSGLEIC-ARD-----G-----EWTSVPP----DPDA--FFVNVADA  
LQVLTNGRFS-----SVKHRG-----  
-----WW-----  
-----  
-----

>LOC\_Os05g11810.1

-----MAQPEKEAAAA  
A-----AAAA-----  
-----VPG-S--PFGYGSK-RIG  
-CN--GDLGWVEY-----LLL-----GVAAAAAAPLP-----  
-AHGEASPSYSGSFR-----DIL-NEYVVAVRA  
MMWEVLKMAE-GL----G--L---KE--KD-----ALVRLV---SHEESDSVLRV  
NHYPPIR-PELQKQGHG-----RL--TGFGHTDPQIISVLR-  
SN---D-TSGLEIS-LRD-----G-----SWASVPP----DRKS--FFVNVGDV  
LQ--PGGRIKLEELQGFLHAV-SLRSRATREATRS-RPAAGLLSLASPTSPPEQPPA--  
-KPDGGK-----DGG----G-GA---FYPLQHPAVGAPTGNRRRG-GDASRRRLRRRRRPE  
AAEPASLLADLAPSQPDRDEVAPAALHQDEALAGAV-----VAPA  
EKAAGWGSRGAGGGDVAGGGDEAASLGAAGSGSPRPDPTPAAGPRRRPAPGRRRRR  
>KQK03260

-----MVVLAKGEL-  
-EQIALP---AAQSP-----PA-----NVQAVDLSSA  
RRSGPGRAA-----AARA-LVAACEEQGFFKVTG--HGV----  
APA--LVRALDAAAAAFF-ALPQAEKEAA-----AGR----PVGYASK-RIG  
-TA--GDLGWIEY-----LLL--CVAPGAGQALPVPASASFSTLPCAAA---AAAAAAS  
LSGSEPESSCPL-R-----GLL-EEYAAALRR  
MACEVLELMAE-GL----G--L---AP--SD-----AISRLV---SDGGSDNMLRV  
NHYPPIR-PEL---QAG-----KN----Q-LL--TGFGHTDPQIISVLR-  
SN---G-TSGLEIASPRD-----G-----AWASVPP----DADS--FFINVDV  
LQVLTNGRFR-----SVKHRV-VV-----N--SE-RPRMSMIFFGGPPPGERLAPLR--  
-ELLGD-----DGG----R-SR---YREFTW-----KEYKST-GCRGR-----  
-----LAEDR-----LCLF  
EN-----

>LOC\_Os01g11150.1

-----MVVLAKGEL-  
-EQIALP---AAHPP-----PA-----DVRAIDL SAT

GPARAA-----EARA-LVAACEEQGFFRVTG--HGV----  
PPG--LVRAAEAAAARFF-ALPQPDKEAA-----AGA---PLGYASK-RIG  
-SA--GDLGWIEY-----LLL-----CLAPAAAAAALPCA-----  
--ATSPTPPCPL-R-----ELL-REYSAAVRR  
VACGVLELMAE-GL----G---V---GP---AD-----ALARLV---AREDSDSILRV  
NHYPPIR-PDQ--LGGG-----GG---P-NL--TGFGHTDPQIISVLR-  
SN---G-APGLEIS-LRD-----G-----AWASVPH---DGDGDSFFVNVGDT  
LQVLTNGRFR-----SVKHRV-VV-----N--SE-KSRVSMVFFGGPPPGERLAPLP--  
-ALLG-----DGG---R-SR--YREFTW-----KEYKGS-GCKGR-----  
-----LADDR-----LCRF  
EN-----

>KQL04928

-----MVLDKGEL-  
-EQIALP---AAQPP-----VA-----DVRSDLSAA  
A--GPAREA-----AARA-LVAACEEHGFFRVTG--HGV----  
PVE--LVRSAAAAAGFF-ALPQGVKEE-----EAP----TLGYGSK-QIG  
-GN--GDLGWIEY-----LLL-GVTPAG-----AVPVATSASSSTLPCAAAAA  
ASWSTSTPAGPL-R-----DLL-DEYTVAVRR  
MACAVLELMEE-GL----G---L---GG---GG-----ALARLV---TNEDSDCVLRV  
NHYPPIR-PAPELAAG-----AP---P-NL--TGFGHTDPQIISVLR-  
SN---G-TSGLEIA-LRG-----G-----AWASVPP---DGDA--FFVNVGDT  
LQVLTNGRFR-----SVRHRV-VV-----N--SE-RSRVSMIFFGGPPPGERLAPLP--  
-QLLG-----DGG---R-SR--YLEFTW-----REFKTS-GCRGR-----  
-----LAEDR-----LSRF  
ENN-----

>Zm00001d008909\_P002

-----MVVLAKGEL-  
-EQIALP---AAEPP-----PA-----DVRSDLSAP  
A--GPAREA-----AARA-LVAACEEHGFFRVTG--HGV----  
PAR--LVRAAEAAAAGFF-ARPQGEKEEE-----GP-----TLGYGSK-RIG  
-GN--GDLGWVEY-----LLL-GGTPAA-----APSSALLPCAAA-----  
--PSPSAPAGPL-R-----DLL-DEYTVAVRR  
MACAVLELMAE-GL----G---I---AGGAGDA-----VLARLV---ARADSDCMLRV  
NHYPPIR-PAL-----N-----P-SL--TGFGHTDPQIISVLR-  
AN---G-TSGLEIA-LRD-----G-----AWASVPP---DGDA--FFVNVGDT  
LQVLTNGRFR-----SVRHRV-VV-----N--SE-KSRVSMVFFGGPPPGERLGPLP--  
-QLLG-----DGG---R-SR--YRDFTW-----SEFKTS-GCRTR-----  
-----LAEDR-----LSRF

EKK-----

>Zm00001d039394\_P001

-----MVVLAKGEL-

-EQIALP---AAAPP-----RA-----DVRSDLSAP  
A--GPAREA-----AARA-LVAACEEHGFFRVGTG--HGV----  
PAE--LVRAAEAAAAGFF-ARPQGEKDG-----EAP----TLGYGSK-RIG  
-GN--GDLGWVEY-----LLL-GVNPAV-----PAASASSSTLP-----  
-----L-R-----GILL-DEYTVAVRR  
MACAVLELMAE-GL----G---I---AG---AGDGDGDTVLARLV---ARADSDCMLRV  
NHYPPIR-PAL-----NY----P-CL--TGFGHTDPQIISVLR-  
AN---G-TSGLEVA-LRD-----G-----AWASVPP----DGDA--FFVNVGDT  
LQVLTNGRFR----SVRHRV-VV-----N--SE-KSRVSMIFFGGPPPDERLAPLP--  
-QLLGD-----DGG----R-SR---YRDFTW-----SEFKTS-GCRTR-----  
-----LAEDR-----LSRF  
EKQ-----  
>EES00081

-----MVVLAKGEL-  
-EQIALP---AAEPP-----PA-----DVRSDLSAP  
A--GPAREA-----AARA-LVAACEEHGFFRVGTG--HGV----  
PPE--LVRAAEAAAAGFF-AQPQDEKDEE-----AP-----TLGYGSK-RIG  
-GN--GDLGWVEY-----LLL-GVTPAG-----AAVPAASASSSTLPAAAAAATA  
SSPSAPAGSAGLLR-----DLL-DEYTVAVRR  
MACAVLELMAE-GL----G---IAGGAGD---GD-----VLARLV---TRADSDCMLRV  
NHYPPIR-PAL-----NP----C-SL--TGFGHTDPQIISVLR-  
AN---G-TSGLEIA-LRD-----G-----AWASVPP----DGDG--FFVNVGDT  
LQVLTNGRFR----SVRHRV-VV-----N--SE-KSRVSMVFFGGPPPGERLAPLP--  
-QLLG-----DGG----RS-----  
-----

>Zm00001d037724\_P002

-----MVVLTKGEL-  
-EQIALPAVQRASPP-----PPA-----AVPEVDLAAG  
D--AAA-----AARA-VAKACEDHGFFKVTG--HGV----  
PPH--LLARLEAAAAAFF-ALPQREKDR-----AAG-C--PFGYASK-RIG  
-AN--GDLGWVEY-----LLL-AVTAAG-----AAAAPGS-----  
--ACEGAEPSCF-R-----AVL-DEYVAAVRR  
MTCTVLQLMAQ-GL----G---L---DD---RD-----VFSRLV---LDRSDSMLRV  
NHYPPIR-AET-----R-RL--TGFGHTDPQIISVLR-  
SN---D-ASGLEIT-LRD-----G-----TWVSVPS----DTES--FFVNVGDA  
LQVLTNGRFR----SVRHRV-MV-----S--SA-RPRVSVIFFGGPPPRERLAPLP--  
-GLVDR-----EGG----R-RR---YREFTW-----REYKNS-AYRTK-----  
-----LADNR-----LCSF  
ETMATS-----  
>KXG21531

-----MVVLTKGEL-  
-EQITLPAVQRAAPP-----LA-----FVPEVDLSAA  
A--AS----VAARSA-----AARA-VAKACEDHGFFKVTG--HGV----  
PAP--LLARLEAAAAAFF-ALPQRDKDKAAAAAVG-----GSP----PFGYASK-RIG  
-GN--GDLGWVEY-----LLL-GVTPAG-----AAAAPSALSAAPVSSA-----  
--SEGAAPSCCF-R-----DVL-DEYIAAVRR  
MTCTVLELMAQ-GL----G---L----DDD--TA-----VFSRLV---LDRSDSMLRV  
NHYPPIR-PETAAAAGE-----PAEVRRL-RL--TGFGHTDPQIISVLR-  
SN---D-TAGLEIS-LRD-----G-----SWVSVPS---DTQS--FFVNVGDA  
LQVLTNGRFR-----SVRHRV-MV-----S--SG-RPRVSVIFFGGPPPRERLAPLP--  
-GLVDR-----EGG----R-RR--YREFTW-----REYKTS-AYRTK-----  
-----LADNR-----LCYF  
ETTTAAAAATS-----  
>HORVU1Hr1G029520.3

-----MVVLAKGEL-  
-EQIALPAVHKTAPP-----LA-----DLPEVDLSVA  
R--SG----SEGRAA-----AARA-VAAACEEHGFFKVTG--HGV----  
PAE--LLARVENAAAAFF-ALSQRDKKAAMSAA-----TPG-S--PFGYASK-RIG  
-NN--GDLGWVEY-----LLL-GVTAAG-----AEAGAPLSVPEE-----  
--VVPSASLCSF-R-----DLL-NEYTVAVRR  
MTCQLLELMAE-GL----G---M---ED---RD-----AFTRLV---LHKESDSMLRV  
NHYPPIR-PELKQHHGG-----RV--TGFGHTDPQIISVLR-  
SN---A-TSGLEIA-LRD-----G-----DWVSVPP---DQTS--FFVNVGDA  
LQVLTNGRFR-----SVRHRV-MV-----N--NI-QPRVSVIFFGGPPPRETLAPLP--  
-QLVG-----EGG----R-SR--YKEFTW-----CEYKAS-AYGTK-----  
-----LAANR-----LCHF  
ETTN-----  
>KQK07053

-----MVVLAQGEL-  
-EQIALPAVQKAAPP-----LA-----DVPEIDLAAA  
G--AGGS--AAGRAA-----AAKA-VAAACEEHGFFKVTG--HGV----  
ASG--LLARVEAAAAADFF-ALPQREKEAAMAMAPAAA--AAGSS--PFGYASK-RIG  
-SN--GDLGWVEY-----LLL-----GVTAAGAPLP-----  
--VPSSASLCAF-R-----ELL-DEYTVAVRR  
MTCEVLELMAE-AL----G---M---E---KD-----EFTRLV---LEEDSDSMLRV  
NHYPPIR-PRPELKQQLQHGGN-----G-RV--TGFGHTDPQIISVLR-  
SN---A-TSGLEIA-LRD-----G-----TWVSVPP---DHTS--FFVNVGDA  
LQVLTNGRFR-----SVRHRV-MV-----N--SV-RSRVSVIFFGGPAPGKTLAPLP--  
-RMVG-----EGG----S-SR--YREFTW-----REYKAS-AYRTK-----  
-----LAENR-----LCHF  
ETTS-----  
>KQL07047

-----  
-----MHLLQQPHYTHAHTTSTPISPLVGPALFRAVLRPPRPYPETAMVVLANPPVV  
DQ---IP---LLRSP-----GPRDSFA-----AVPVVDLSGP  
G-----AARA-IVDACERFGFFKVVN--HGV----  
AAA--TMDRAETEAIRFF-AQAQADKDRA-----GPA-Y--PFGYGSK-RIG  
-LN--GDMGWLEY-----LLL-----AVDSASLSDACSV-----  
-----SNAAF-R-----AAL-NEYIAAVRK  
VAVRVLEAMAE-GL---G---I---AP---LD-----ALSAMV---TEQGSQVFRV  
NHYP-PC-PALQGLG-----C-SA--TGFEHTDPQLVSVLR-  
SN---G-TSGLQIA-LRD-----G-----AQWVSVPS----DRDA--FFVNVGDS  
LQVLTNGRFK-----SVKHRV-VT-----N--SL-KSRVSFIYFGPPLAQRIEPL--  
-ELG-----EGE---E-SL---YKEFTW-----GEYKKA-AYKTR-----  
-----LGDNR-----LAQF  
EKK-----  
>Zm00001d012712\_P001

-----  
-----MVVLANPPVV  
DQ---IP---LLRSP-----GPRDSFS-----CVPVVDLSGP  
G-----AARA-IVDACERFGFFKVVN--HGV----  
PAA--TMDVAESEAVGFF-AQAQADKDRA-----GPR-ASYPFGYGSK-RIG  
-LN--GDMGWLEY-----LLL-----AVDSASLSDACPVP-----  
-----SGAAF-R-----SAL-NEYVAAVRD  
VAARVLEAMAE-GL---G---I---AD---AA-----ALSSMV---TGAGSDQVFRV  
NHYP-PC-PALQGLGCT-----A-TA--TGFEHTDPQIISVLR-  
SN---G-TSGLQVA-LRD-----A---AQAQQWVSVPS----DRDA--FFVNVGDS  
LQVLTNGRFE-----SVKHRV-VT-----N--SL-KSRVSFIYFAGPALEQRIAPLA--  
-QLLA-----EGE---E-SL---YREFTW-----GEYKTA-AYKTR-----  
-----LGDNR-----LAQF  
QRCSI-----  
>Zm00001d043411\_P001

-----  
-----MVVLAKPPVV  
DQ---IP---LLRSP-----GPRDSFS-----GVPVVDLSSH  
G-----AARA-IVDACERFGFFKVVN--HGV----  
AAA--TMDRAESEAVRFF-AQAQADKDRA-----GPA-Y--PFGYGSK-RIG  
-LN--GDMGWLEY-----LLL-----AVDAASLSDACPVP-----  
-----SSAAF-R-----SAL-NEYVAAVRK  
VAARVLEAMAE-GL---G---I---AD---AD-----ALSSMV---SGAGSDQVFRV  
NHYP-PC-PALQGLG-----C-ST--TGFEHTDPQIISVLR-  
SN---G-TSGLQIA-LRD-----G-----AQWVSVPS----DRDA--FFVNVGDS  
LQVLTNGRFR-----SVKHRV-VT-----N--SL-KSRVSFIYFAGPPLGQRIAPLP--  
-QVLA-----EGE---E-SL---YKEFTW-----GEYKKA-AYKTR-----  
-----LGDNR-----LAQF  
EKRSNI-----

>EES01498

-----  
-----MVVLANPPVW  
DQ---IP---LLRSP-----GPRDTFS-----GVPVVDLSSP  
A-----AARA-IVDACERFGFFKVVN--HGV----  
PAA--TMGRAESEAVRFF-AQAQADKDRA-----GPA-Y--PFGYGSK-RIG  
-LN--GDMGWLEY-----LLL-----AVDSASLSDACPVP-----  
-----STAAF-R-----SAL-NEYVAAVRK  
VAVRVLEAMAE-GL---G---I---AD---AA-----ALSSMV---TGAGGDQVFRV  
NHYPPEC-PALQGLG-----C-SA--TGFEHTDPQLISVLR-  
SN---G-TSGLQIA-LRD-----G-----AQWVSVPS----DRDA--FFVNVGDS  
LQVLTNGRFGK----SVKHRV-VT-----N--SL-KSRVSFIYFAGPALEQRIVPLP--  
-ELLA-----EGE----E-SL---YKEFTW-----GEYKKA-AYKTR-----  
-----LGDNR-----LAQF  
EKRSI-----

>LOC\_Os01g55240.1

-----  
-----MVVLGPPAV  
DH---IP---LLRSP-----DPGDVFS-----GVPVVDLGSP  
G-----AARA-VVDACERYGFFKVVN--HGV----  
ATD--TMDKAESEAVRFF-SQTQPKDQRS-----GPA-Y--PFGYGSK-RIG  
-FN--GDMGWLEY-----LLL-----ALDDASLADACTVP-----  
-----SCAVFR-----AAL-NEYISGVRK  
VAVRVMEAMSE-GL---G---I---AQ---AD-----ALSALV---TAEGSDQVFRV  
NHYPPEC-RALQGLG-----C-SV--TGFEHTDPQLVSVLR-  
SN---G-TSGLQIA-LRD-----G-----QWVSVPS----DRDS--FFVNVGDS  
LQVLTNGRFGK----SVKHRV-VA-----N--SL-KSRVSFIYFGGPPLAQRIAPLP--  
-QLLG-----EGE----Q-SL---YKEFTW-----DEYKKA-AYKSR-----  
-----LGDNR-----LAQF  
EKK-----

>KQK09810

-----  
-----MVVLASPPAA  
DH---IP---LLRSP-----DPGDYFS-----GMPVIDLCSP  
G-----APRA-IADACERFGFFKLVN--HGV----  
ATD--AMDRLESEAVTFF-SQPQADKQRS-----GPA-Y--PFGYGSK-RIG  
-LN--GDMGWLEY-----LLL-----AVDDSASLSGAVP-----  
-----SGSAF-R-----RAL-NEYIGAVRK  
VAVRVMEAMAE-GL---G---I---AP---LD-----ALSKMV---TAAGSDQVFRV  
NHYPPEC-AALQGLG-----C-SA--TGFEHTDPQLVSVLR-  
SN---G-TSGLQIA--LQ-----DGG-----QWVSVPS----DRDA--LFVNVGDS  
LQVLTNGRFGK----SVKHRV-VA-----N--SL-KSRVSLIYFGGPPLTQRIAPLP--  
-QLLG-----EGE----Q-SL---YTEFTW-----SEYKKA-AYKSR-----  
-----LGDNR-----LAQF

QK-----  
>HORVU3Hr1G072810.1  
-----  
-----MVVLGTPAV  
DH---IP---LLRSP-----DPGDNFS-----GMPVVDLSRP  
G-----APRA-IADACERFGFFKLVN--HGV----  
ALD--AMDRLESEAVRFF-SLPQADKDRS-----GPA-Y--PFGYGSK-RIG  
-LN--GDMGWLEY-----LLL-----AVDSASLP-----  
--AASAVPSCALFR-----AAL-NEYIAAVRK  
VAVRVMEAMAE-GL----G---I---AP---AD-----ALSAMV---AAEGSDQVFRV  
NHYPPEC-HALQGLG-----C-SA--TGFGHTDPQLISVLR-  
SN---G-TSGLQIA-LQS-----G-----HWVSVPS---DRDA--FFVNVGDS  
LQVLTNGRKF-----SVKHRV-VA-----N--SL-KSRVSMIYFGGPALTQRIAPLP--  
-QLLR-----EGE---Q-SL--YKDFTW-----GEYKKA-AYNSR-----  
-----LGDNR-----LAHF  
HR-----  
>LOC\_Os05g43880.1  
-----  
-----MVVLAKPAAL  
EQIS-----LVRSP-----SVEDNFG-----AGLPVVDLAAD  
G-----AAGE-VVRACERFGFFKVVS--HGV----  
GEG--VVGRLEAEAVRFF-ASPQAAKDAH-----GPA-S--PFGYGSK-RIG  
-RN--GDMGWLEY-----LLL-----AIDGASLS-----  
--RSSPAPSSSL-R-----DAA-NKYVGAMRG  
MARTVLEMVAE-GL----G---V---AP---RG-----ALADMV-VGDGAASDQILRL  
NHYPPECPLLQNLMPN-----C-SP--TGFGHTDPQLISILH-  
SN---S-TSGLQVA--LHHDAD-----A---GDHQWVTVPP---DPAS--FLVIVGDS  
LQVMTNGRMR-----SVRHRV-VA-----N--KL-KSRVSMIYFGGPPLEQRIAPLR--  
-QLLVAGVGNGEEEE---Q-SR--YEEFTW-----GEYKKA-AYLSR-----  
-----LSDNR-----LAPF  
HRQPPPVANPLA-----  
>Zm00001d038695\_P001  
-----  
-----MVVLAKPPAL  
DQISLL----RSPQP-----GDASSFP-----GVPVVDLSSP  
G-----AALA-VVDACERFGFFKVVN--HGV----  
PAG--VVDREAEAVRFF-ASPQAAKDACGC-----GPA-S--PLGYGNR-RIG  
-RN--GDMGWLEY-----LLL-----ALDGNASVSKASPVP-----  
--SSSLRSGPAC-R-----DAV-NQYVASVRG  
LATSVLEAAE-GL----G---V---AP---RD-----ALSGMV---ADAASDQVFRV  
NHYPAC-PLLQRLPDS-----C-GV--TGFGHTDPQLVSVLR-  
SN---G-TPGLQLA--LH-----G---DDGRWVPVPP---DRDA--FFVIVGDS  
LQVLTNGRLK-----SVRHRV-VA-----N--SL-KPRVSMIYFAGPAPAQRIAPLP--  
-QLLG-----HGK---Q-SL--YRDFTW-----GDYKKA-AYRSR-----



```

-----LGDNR-----LDPF
RI-----
>EES19801
-----
-----MVLAKPPPA
LDQISLL---RCPQP-----GDAASFF-----GVPVDLSSP
G-----AALA-VVDACERFGFFKVVN--HGV----
PTG--VVDRLAEAVRFF-ASPQADKDAC-----GPA-N--PLGYGNK-RIG
-RN--GDMGWLEY-----LLL-----ALDGASSVS-----
--KASPVPSSSL-R-----DAV-NQYVAAVRG
LATSVLEAVAE-GL---G---V---AP---RD-----ALSGMV---TDAASDQVFR
NHYPAC-PLLQRLPDS-----C-GV--TGFGHTDPQLVSVLR-
SN---G-TAGLQVA--LH--DD-----G---G--RWVPVPP----DRDA--FFVIVGDS
LQVLTNGRLK----SVRHRV-VA-----N--SL-KPRVSMIYFAGPAPAQRIAPLP--
-QVLG-----HGE---Q-SL---YRDFTW-----GDYKKA-AYRSR-----
-----LGDNR-----LDPF
RIQ-----
>KQK05406
-----
-----MVLAKPAAL
EQISLLR-----TP-----EPWESFA-----GVPVDLSAP
G-----AADD-VVRACERFGFFSVVN--HGV----
ARG--VVERLEHEAALFF-SWPQADKASAS-----GPA-D--PFGYGSK-RIG
-RN--GDMGWLEY-----LLL-----AIDRESLS-----
--KASPAPSSSL-R-----DAI-NEYVGAMRG
LARTVLEMVAE-GL---G---V---SP---RG-----ALADMV---TGEASDQVFR
NHYPAC-PLLQGLPPN-----C-SV--TGFGHTDPQLVSILH-
SN---A-TAGLQIA--LH--GD-----G---DAQKWVSVPP----NRDA--FFVNVGDS
LQVLTNGRLK----SVRHRV-VA-----G--SGRKSVMIYFGPPVAQRIAPLP--
-QLLQ-----AEG---QLPI---YREFTW-----GEYKKA-AYRSR-----
-----LGDNR-----LAPF
QMTLVELQHAHADAAGLHHS-----
>HORVU1Hr1G076730.2
-----
-----APPHLELLSPVLHCCDSSSLYGVSGTDRFALPLLCLAQLSSVSFLAMVVL
AKPAALEQIALMRTP-----EPWESFS-----GVPVDLSSP
G-----AAAD-VVRACERFGFFSVVN--HGV----
PAG--VVDRLAEAVRFF-ASTQAEKDAS-----GPA-D--PFGYGSK-RIG
-RN--GDMGWVEY-----LLL-----AIDRDTLS-----
--KASPAPSSAL-R-----EAI-NAYVSAMRG
LARTVLEMVAE-GL---G---V---SP---RG-----ALADMV---TGEASDQVFRV
NHYPAC-PLLQGLPPN-----C-SV--TGFGHTDPQLVSILH-
SN---G-TAGLQVA--LHD-----G-----RWVSVPP----NRDA--FFVNVGDS
LQVLTNGRLR----SVRHRV-VA-----G--NGLKSRVSMIYFAGPPLAQRIAPLQ--

```

-QLLA-----GTQ----SLPL---YRDFTW-----GEYKKA-AYRSR-----  
 -----LGDNR-----LAPF  
 ETPLVAMPHAAHRS-----  
 >HORVU1Hr1G086710.2  
 -----  
 -----MTTTANVPLLLTSLLLLCFTYISVLCEIVL  
 LAMVGVTVPISVDTI-----PLVKCAH-----AAAAVPSVDLSAP  
 D-----AGAA-VAAACRRVGFFRATN--HGV----  
 PAA--LTDALAEARAEAFF-ALPHEDKLEA-----SAR---PFGYGSK-SIG  
 -CN--GDVGWLEY-----ILL-----SVGSGSVAAACLPP-----  
 --SL-----R-----AAL-EEYTDARE  
 VGARVLELMAD-GL---G---V--AEEH---RG-----VLRQMA---EADGADEMVRV  
 NHYPPC-PCPLAAGQR-----GV--TGFEHTDPQIISVLR-  
 SN---R-TGGLQIA-LPD-----G-----RWVPVAP---DPDS--LFVNVGDS  
 LQVLTNGRFR-----SVKHRV-VA-----PAEGQ-QPRLSVIYFGGPAPTQRIAPLP--  
 -ELMR-----EGE---Q-SL---YRDFTW-----AEYKKA-AYKSR-----  
 -----LGDHR-----LGPF  
 ELPAAEPTSSDKHCGSNAVQLPAPAPLHVAVRH-----  
 >HORVU1Hr1G086810.2  
 -----  
 -----TVAITVPISV  
 DTIPLLK-----CVNAATA-----AVPSVDLSAP  
 G-----AAAA-VADACRAVGFFRATN--HGV----  
 PAA--LTDALAEERAAFF-ALPHKDKMDA-----SAR---PFGYGSK-NIG  
 -CN--GDVGWLEY-----ILL-----SVRSGSVAAA-----  
 --SLPPSLRAAL-----EEYTDARE  
 VGARVLELMAD-GL---G---V--AEEH---RG-----VLRRMVAPDDAGGADEMVRV  
 NHYPPC-PSSLAAGQR-----GV--TGFEHTDPQIISVLR-  
 SN---R-TAGFQIM-LPD-----G-----RWVPVAP---DTDS--LFVNVGDS  
 LQVLTNGRFR-----SVKHRV-VA-----PTEGQ-QPRLSVIYFGGPAPTQRIAPLP--  
 -ELMR-----EGE---Q-SL---YRDFTW-----AEYKKA-AYKSR-----  
 -----LGDHR-----LGPF  
 ELPAAATAQESTTKADHYCSSNAAVQAPAAAPHVARVH-----  
 >KQK04908  
 -----  
 -----MAAITMTALPSSV  
 DHQVVIP---LLKCP---IAAAAAAAM-----IPTVDLSSP  
 G-----AARA-VAEACRGVGFFRATN--HGV----  
 PSS--LAATLEADAMAFF-ALPDKDKQSTTTTTTPAP-----GPGSARPSLGYGSR-RIG  
 -SN--GDVGWLEY-----LIL-----SLGSNSVLP-----  
 -----ASL-R-----LAL-HEYTRAVRE  
 LSGRVLELMAE-GL---G---I---VGETERG-----VLRRMV-----AGSEEELVRV  
 NHYPPP-TTERDEDD-----GC---V-GI--TGFEHTDPQLISLLR-  
 SN---R-TAGYQIL-LQE-----A---DEARWVNVAP---DPDS--FFVNVGDT

LQVLTNGRFR-----SVKHRVLVA-----PERGGKASRLSVIYFGGPAPAQRIAPLP--  
-ELMR-----EGE---R-SL---YRDFTW-----GEYKAA-AYKTR-----  
-----LGDHR-----LGP  
QVQLLPAAAKA-----  
>KQK04914

-----MVAIKAPSSI  
DHANPLT-----KSP-----KAAAAA-----AAIPTVDLSSP  
G-----AARA-VADACRGVGFRRATN--HGI---  
PSS--LAAALEARAMAFF-ALPHEDKVDATI-----AAA-ARRPFGYGSR-SIG  
-SN--GDVGWLEY-----LLL-----SLGSNSNSSIP-----  
--GASSLPPLR-----AAL-EEYTGAVRN  
ASGVLELMAE-GL---G---M---QE---RC-----ALRRMV---DGSEELVRV  
NHYPPT-KEEDCV-----A-GM--TGFEHTDPQIISLLR-  
SN---R-TAGLQIK--LQ-----G---PDAPWVNVAP---DPDS--LFVNVGDC  
LQVLTNGRFR-----SVKHRV-VA-----PEGAQ-ASRLSVIYFGGPAPAQRIAPLP--  
-ELMR-----EGE---Q-SL---YRDFTW-----GEYKAA-AYKTR-----  
-----LGDNR-----LGPY  
ELRNVADTNPTALITASKEPTAADHCCSNSSSSAACVVVQPPHVAQVH-----  
>LOC\_Os05g48700.1

-----MVAITAPSSI  
EH---IP---LVRCP-----KGANAGP---QA-----VIPCIDLAP  
G-----AAAA-VADACRTLGFFKATN--HGV---  
PAG--LADALESSAMAFF-ALPHQEKLDMS-----GPA-R--PLGYGSK-SIG  
-SN--GDVGWLEY-----LLL-----SAGAASSGGAALP-----  
-----AAL-R-----AAV-EAYTGAVRG  
VGCRMELMAE-GL---G---LGASEEG---RC-----VLRRMV--VGCEGSDEMLRV  
NHYPPT-LLPPGRDRDE-----C-GV--TGFEHTDPQIISVLR-  
SN---C-TAGLQIL--LR---GDYSSPA-----RWVPVPP---DPDS--FFVNVGDS  
LQVLTNGRFR-----SVKHRV-LA-----P--EGEESRLSVIYFGGPAASQRIAPLE--  
-QVMR-----EGE---Q-SL---YREFTW-----GEYKKA-AYKTR-----  
-----LGDNR-----LGPY  
ELQHAAANDEAATKK-----  
>KQL14341

-----MVAITAPSSI  
DQ---IP---LMRCP-----KANAGQA-----AAAPCVDLAP  
G-----AAAA-VADACRSVGFRATN--HGV---  
PAS--VADALEAGAMAFF-ALPAQDKVDMSG-----AAR---PLGYGSK-SIG  
-SN--GDVGWLEY-----LLL-----SVSANSVKIS-----  
--SLPPSLRAAL-----EEYTAARE  
VGGRVLELIAE-GL---G---V---D---RA-----LLRSMV--VGREGGDELVRV  
NHYPPT-PLRAPGD-----C-GV--TGFEHTDPQIISVLR-

SN---C-TAGLQIK-LRD-----G-----RWVPVPP----DPES--FFVNVGDS  
 LQVLTNGRFR----SVKHRV-VA-----P--EGSHSRLSVIYFGGPAPSQRIAPLP--  
 -QVMR-----DGE----Q-SL---YREFTW-----GEYKRA-AYETR-----  
 -----LGDHR-----LGSF  
 ELRAASEPAGGADPQPHCSNSSTCMPPQQQQQVAQVY-----  
 >Zm00001d038996\_P001  
 -----  
 -----MVAITAPSSI  
 EQIPLMR---CPRAN-----AVQQAGA-----AVPCVDLSAP  
 G-----AGAA-VADACRSVGFFRATN--HGV----  
 PAR--VADALEARAMAFF-ALPAQEKLDMSG-----AAR----PLGYGSK-SIG  
 -AN--GDVGWLEY-----LLL-----SVSANTVKIS-----  
 --SLPPSLRAAL-----EEYTAALRE  
 VCGRVLELIAE-GL---G---V---E---RS-----LLRAMV--VGREGSDEVVRV  
 NHYPPC-PLLPPVD-----C-GV--TGFGHTDPQIISVLW-  
 SN---R-TAGLQIK-LRD-----G-----RWVPVPP----TPES--LFVNVGDS  
 LQVLTNGRLR----SVKHRV-VA-PAPAPD--GA-RSRLSVIYFGGPAPSQRIAPLP--  
 -QVMR-----DGE----Q-SL---YREFTW-----AEYKRA-MYKTR-----  
 -----LADHR-----LGPF  
 ELRASTNGGNRPGEPAAAGSADPAHCSGGSACGMPQPQQVARVH-----  
 >EES19940  
 -----  
 -----MVAITAPSSI  
 EQ--IP--LVQCP---RANASA-----AIPCVDLSAP  
 G-----AAAA-VADACRGGVGFRRATN--HGV----  
 PAR--VVEALEARAMAFF-ALPAQEKLDMS-----GAA-R--PMGYGSK-RIG  
 -SN--GDVGWLEY-----LLL-----SVSANTVKIS-----  
 --SLPPSLRAAL-----EEYTAARE  
 VCGRVLELIAE-GL---G---V---D---RS-----LLRAMV--VGREGSDELVRV  
 NHYPPC-PLLPPVD-----C-GV--TGFGHTDPQIISVLR-  
 SN---S-TAGLQIK-LRD-----G-----RWVPVPP----APES--FFVNVGDA  
 LQVLTNGRFR----SVKHRV-VA-----P--EGAQSRLSVIYFGGPAPSQRIAPLP--  
 -EVMR-----DGE----Q-SL---YREFTW-----AEYKTA-MYKTR-----  
 -----LADHR-----LGPF  
 ELRATNTNSCVPPPPPSVDPYCNGSGICMPQPPPPQQQVAEVH-----
