# Supplementary figures and images for: Genome-Wide Identification and Evolution Analysis of the Gibberellin Oxidase Gene Family in Six Gramineae Crops
Source: MDPI journal article supplement (doi:10.3390/genes13050863), 2022-05-12

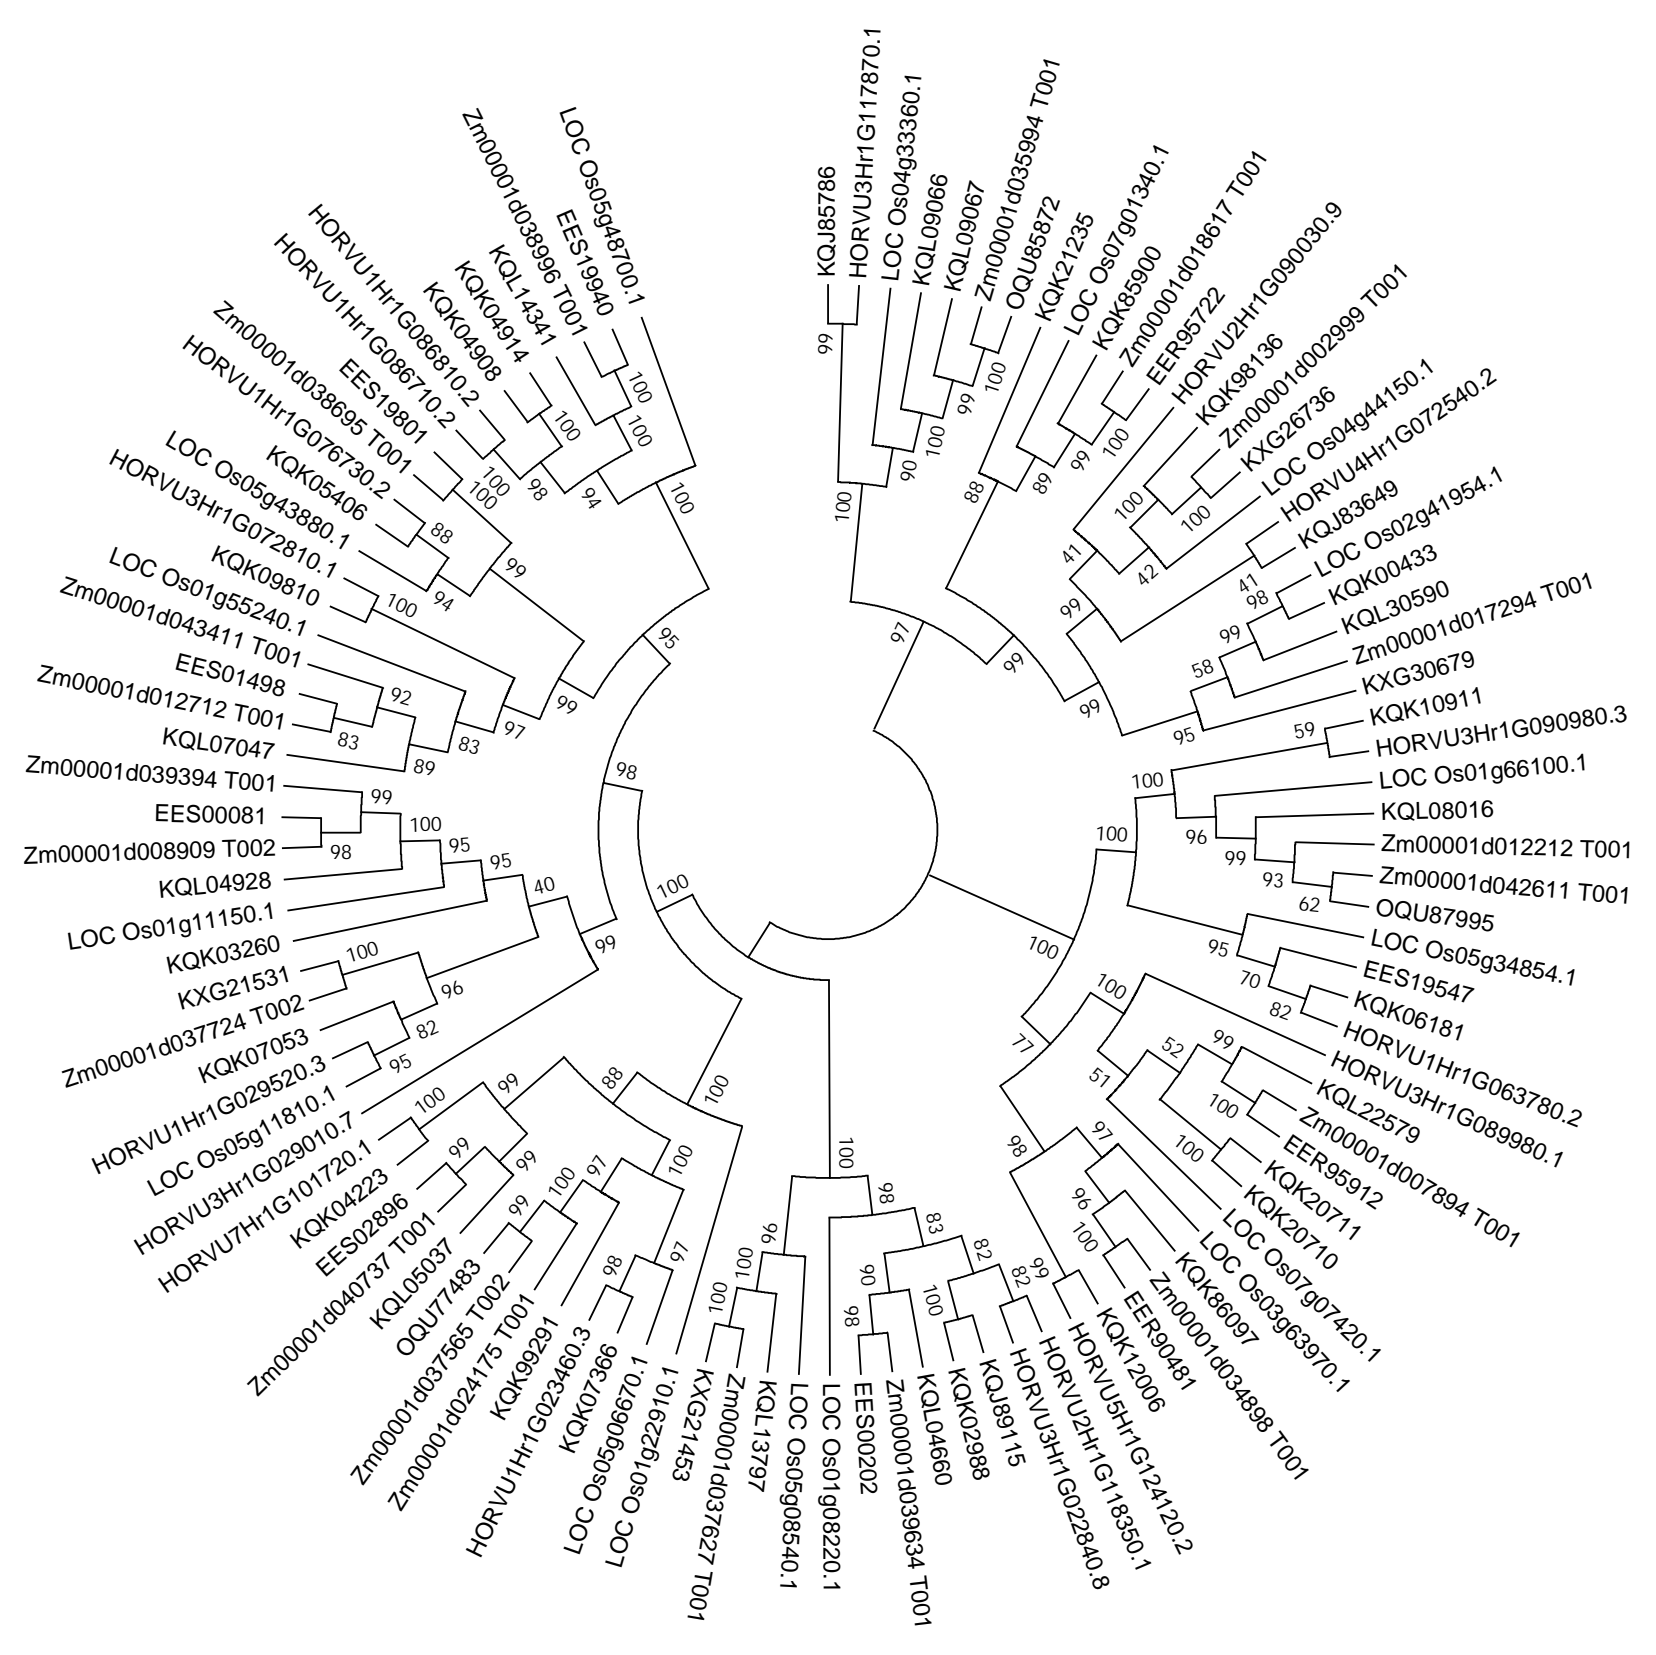

Supplement: s1 [file s1]

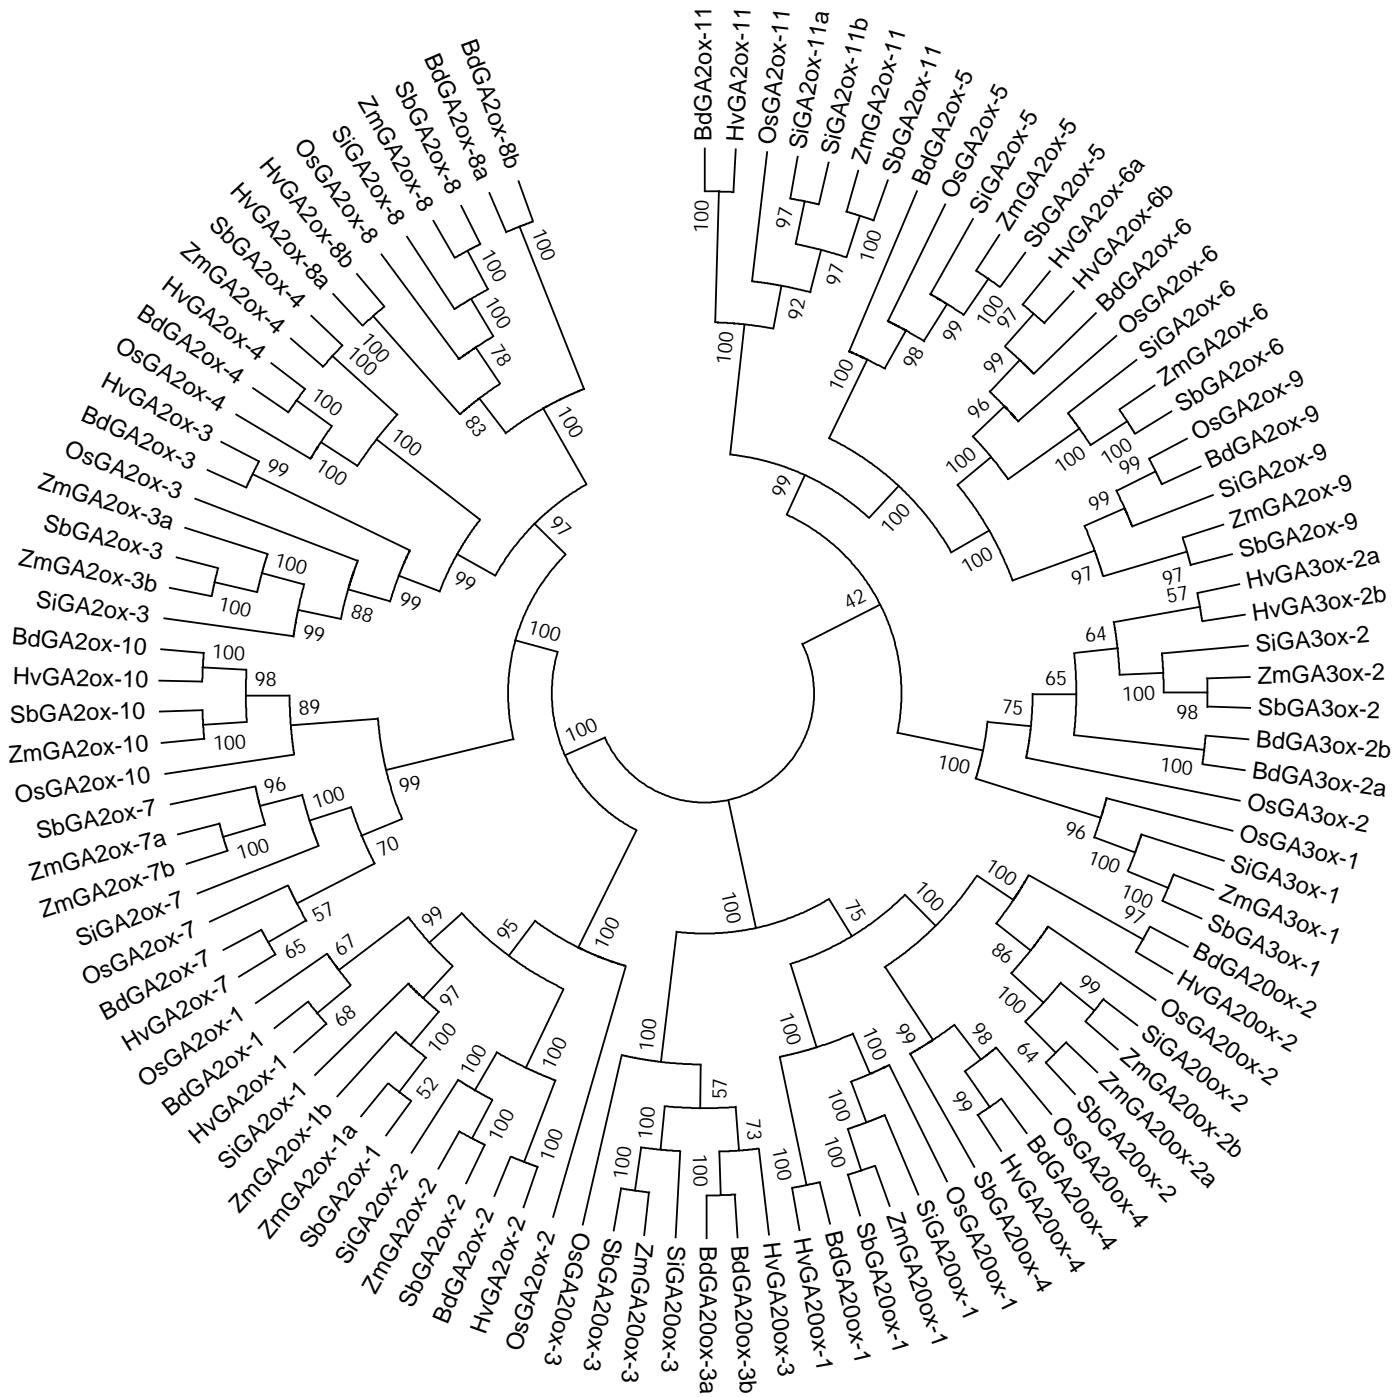

Supplement: s1 [file s1]

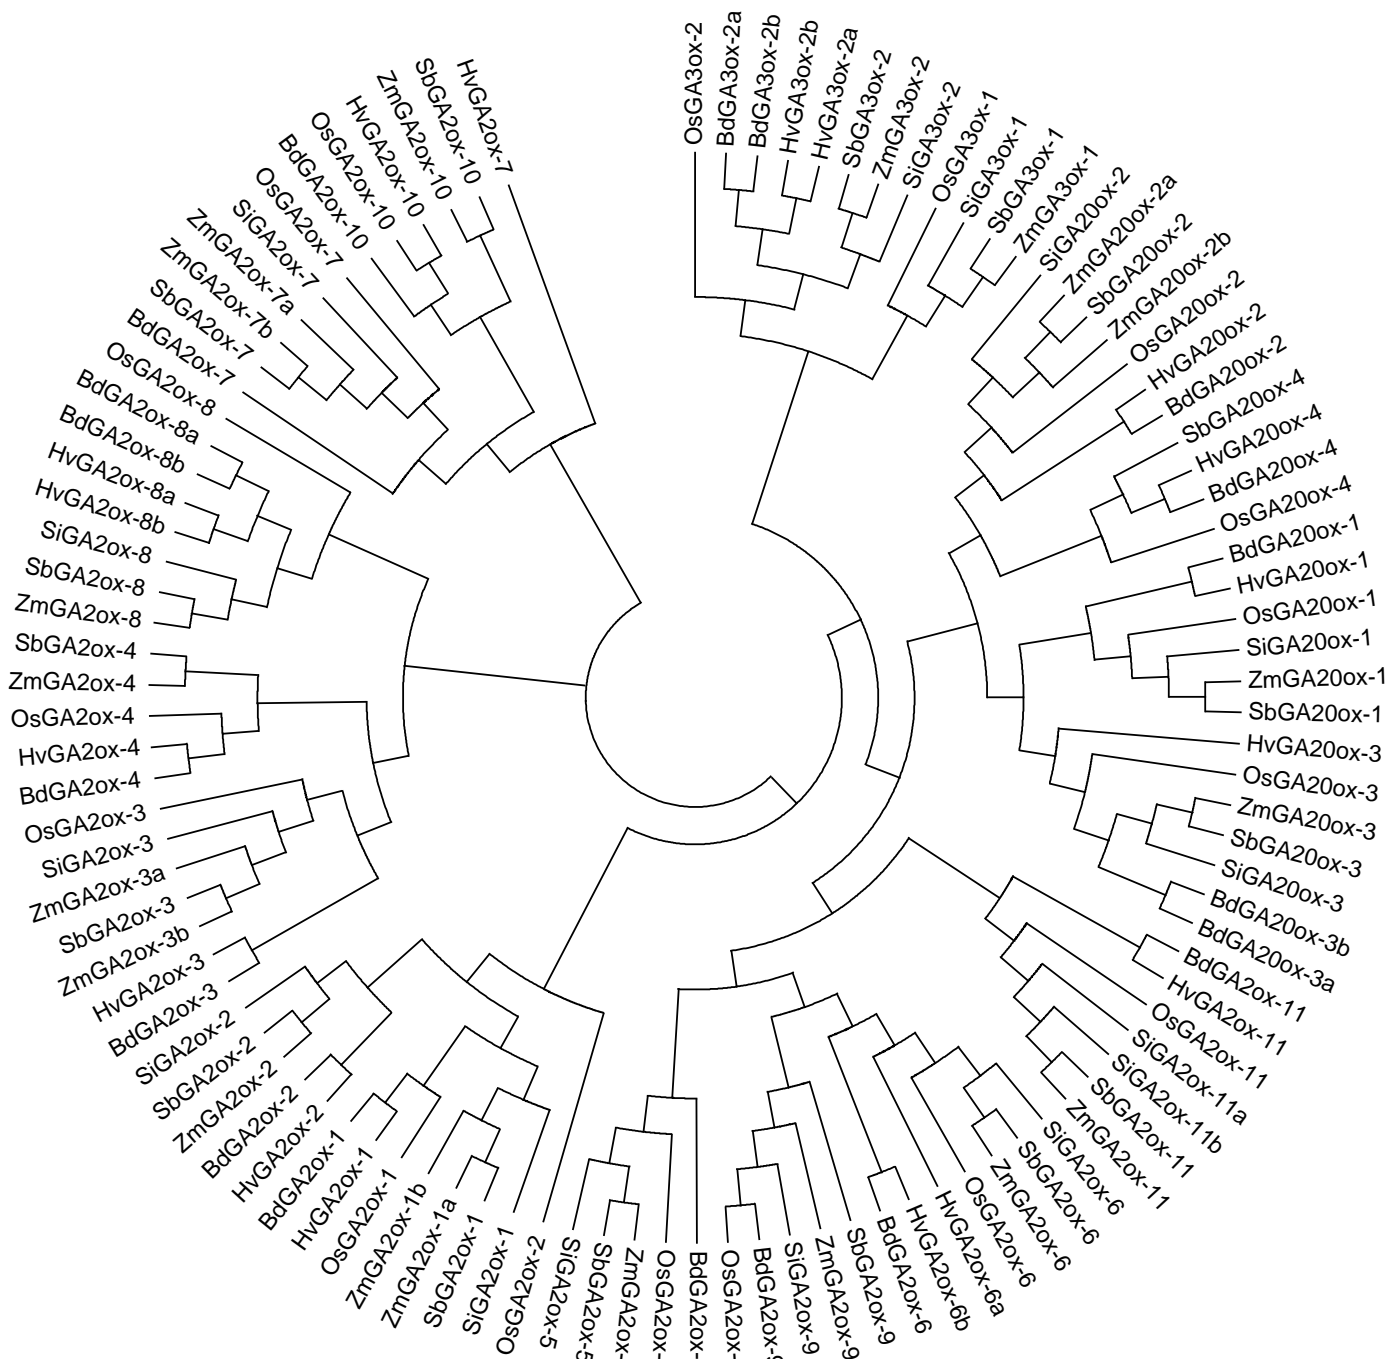

Supplement: s1 [file s1]
